# Supplementary material for: Genome-wide association study of leprosy in Malawi and Mali
Source: PLoS Pathog. 2022 Sep 19;18(9):e1010312. doi: 10.1371/journal.ppat.1010312 (PMC9624411; doi:10.1371/journal.ppat.1010312)
Supplement: S3 Table — (XLSX) [file ppat.1010312.s016.xlsx]

## Sheet: Sheet1
					Malawi				Mali				Meta-analysis		99% credible SNP set
SNP	Chr	Position	Ref allele	Eff allele	EAF	Info	OR (95% CI)	P-value	EAF	Info	OR (95% CI)	P-value	OR (95% CI)	P-value
rs2015583:G	10	104226983	A	G	0.247478	0.904103	0.52 (0.38-0.7)	6.98628e-06	0.342414	0.913723	0.5 (0.34-0.72)	0.000114056	0.51 (0.4-0.64)	8.81488e-09	yes
rs3740414:G	10	104232809	T	G	0.249757	0.903268	0.51 (0.38-0.69)	5.52123e-06	0.345411	0.913519	0.52 (0.36-0.74)	0.000235395	0.52 (0.41-0.65)	1.32459e-08	yes
rs58061354:T	10	104230930	TTCGGTGCTGGG	T	0.249646	0.902847	0.51 (0.38-0.69)	5.5378e-06	0.34527	0.91424	0.52 (0.36-0.74)	0.000235011	0.52 (0.41-0.65)	1.32767e-08	yes
rs11191295:G	10	104231054	A	G	0.249646	0.902859	0.51 (0.38-0.69)	5.53958e-06	0.343325	0.914067	0.52 (0.36-0.74)	0.000235861	0.52 (0.41-0.65)	1.33192e-08	yes
rs41306870:T	10	104229785	C	T	0.249648	0.902847	0.51 (0.38-0.69)	5.53673e-06	0.342362	0.913939	0.52 (0.36-0.74)	0.000236035	0.52 (0.41-0.65)	1.33223e-08	yes
rs2025712:C	10	104230064	T	C	0.249647	0.902851	0.51 (0.38-0.69)	5.53868e-06	0.345252	0.914283	0.52 (0.36-0.74)	0.000236036	0.52 (0.41-0.65)	1.33257e-08	yes
rs2025713:G	10	104230156	A	G	0.249647	0.902851	0.51 (0.38-0.69)	5.53868e-06	0.345238	0.91425	0.52 (0.36-0.74)	0.000237281	0.52 (0.41-0.65)	1.3387e-08	yes
rs12781718:A	10	104227433	G	A	0.248161	0.903608	0.51 (0.38-0.69)	5.8449e-06	0.341964	0.912884	0.51 (0.36-0.74)	0.000242573	0.51 (0.41-0.65)	1.44266e-08	yes
rs12763794:C	10	104227661	T	C	0.247198	0.905141	0.52 (0.38-0.7)	7.00849e-06	0.341021	0.914928	0.51 (0.35-0.73)	0.000205953	0.51 (0.41-0.65)	1.46539e-08	yes
rs12762305:T	10	104227623	C	T	0.247182	0.905222	0.52 (0.38-0.7)	7.0283e-06	0.34101	0.914971	0.51 (0.35-0.73)	0.000206455	0.51 (0.41-0.65)	1.472e-08	yes
rs12781742:A	10	104227469	G	A	0.247181	0.90522	0.52 (0.38-0.7)	7.02783e-06	0.341002	0.914941	0.51 (0.35-0.73)	0.00020681	0.51 (0.41-0.65)	1.47395e-08	yes
rs1984795:T	10	104226830	C	T	0.247529	0.904233	0.52 (0.39-0.7)	8.06845e-06	0.341493	0.913945	0.51 (0.35-0.73)	0.000206413	0.52 (0.41-0.65)	1.66185e-08	yes
rs11593583:A	10	104228149	G	A	0.246388	0.90515	0.52 (0.39-0.7)	9.19841e-06	0.339839	0.913978	0.51 (0.35-0.73)	0.000208513	0.52 (0.41-0.65)	1.88843e-08	yes
rs11593589:A	10	104228299	C	A	0.24638	0.905187	0.52 (0.39-0.7)	9.17333e-06	0.339891	0.915274	0.51 (0.35-0.73)	0.000209992	0.52 (0.41-0.65)	1.89825e-08	yes
rs11593526:A	10	104228017	C	A	0.246361	0.90514	0.52 (0.39-0.7)	9.15791e-06	0.339884	0.91524	0.51 (0.35-0.73)	0.000210403	0.52 (0.41-0.65)	1.899e-08	yes
rs3740415:A	10	104232716	G	A	0.249478	0.904415	0.52 (0.38-0.69)	5.56645e-06	0.344012	0.914819	0.53 (0.37-0.76)	0.000414397	0.52 (0.41-0.65)	2.20892e-08	yes
rs7081110:G	10	104231651	A	G	0.24939	0.904125	0.52 (0.38-0.69)	5.6393e-06	0.343905	0.91528	0.53 (0.37-0.76)	0.000418952	0.52 (0.41-0.65)	2.25671e-08	yes
rs7081467:C	10	104231662	G	C	0.24939	0.904125	0.52 (0.38-0.69)	5.6393e-06	0.343906	0.915268	0.53 (0.37-0.76)	0.000418952	0.52 (0.41-0.65)	2.25671e-08	yes
10:104229299:AGGT	10	104229299	A	AGGT	0.21776	0.867429	0.5 (0.36-0.69)	1.34436e-05	0.328097	0.87574	0.51 (0.35-0.75)	0.00034501	0.51 (0.4-0.65)	4.77411e-08	yes
rs35826034:G	10	104227791	GA	G	0.266055	0.877067	0.58 (0.43-0.77)	0.000106714	0.357599	0.882259	0.48 (0.33-0.7)	7.59186e-05	0.54 (0.43-0.68)	9.45989e-08	yes
rs11591780:G	10	104225316	C	G	0.239712	0.90593	0.52 (0.38-0.7)	1.18809e-05	0.308841	0.925272	0.57 (0.4-0.82)	0.00237302	0.54 (0.43-0.68)	2.12669e-07	yes
rs11356476:G	10	104231519	GA	G	0.303505	0.843141	0.57 (0.43-0.76)	9.23278e-05	0.377746	0.853548	0.52 (0.36-0.76)	0.000404126	0.55 (0.44-0.69)	2.87354e-07	yes
rs35249074:GT	10	104229309	G	GT	0.189187	0.758015	0.49 (0.35-0.71)	5.80262e-05	0.234732	0.731452	0.48 (0.3-0.77)	0.00191213	0.49 (0.37-0.65)	9.18513e-07	yes
rs71016381:C	10	104226239	CAAA	C	0.215922	0.886636	0.53 (0.38-0.73)	6.11082e-05	0.269767	0.902314	0.56 (0.37-0.84)	0.00487324	0.54 (0.42-0.69)	1.65985e-06	yes
rs139495724:CA	10	104228423	C	CA	0.270126	0.776626	0.59 (0.43-0.8)	0.000501117	0.327039	0.805836	0.51 (0.34-0.75)	0.000508292	0.56 (0.44-0.71)	2.01261e-06	yes
10:104295687:AGAT	10	104295687	A	AGAT	0.131565	0.77157	0.55 (0.37-0.83)	0.00291694	0.268878	0.800966	0.43 (0.28-0.66)	6.41937e-05	0.49 (0.37-0.66)	2.03749e-06	no
rs715440:T	10	104258095	A	T	0.215522	0.883781	0.55 (0.4-0.75)	0.000102201	0.273648	0.880693	0.55 (0.36-0.84)	0.00456029	0.55 (0.43-0.7)	2.49455e-06	yes
10:104278272:GTCTATCTA	10	104278272	G	GTCTATCTA	0.207247	0.888675	0.55 (0.4-0.76)	0.000163616	0.269838	0.877065	0.55 (0.36-0.83)	0.0037953	0.55 (0.43-0.71)	3.35002e-06	yes
rs12768479:A	10	104278276	G	A	0.207247	0.888675	0.55 (0.4-0.76)	0.000163616	0.269838	0.877065	0.55 (0.36-0.83)	0.0037953	0.55 (0.43-0.71)	3.35002e-06	yes
rs35597970:CA	10	104229057	C	CA	0.206499	0.889017	0.55 (0.4-0.76)	0.000175722	0.265085	0.901123	0.55 (0.37-0.84)	0.00482347	0.55 (0.43-0.71)	4.39714e-06	yes
rs2274351:T	10	104264107	C	T	0.206896	0.903001	0.56 (0.41-0.76)	0.000159181	0.264079	0.909359	0.56 (0.37-0.85)	0.00592412	0.56 (0.44-0.72)	4.7151e-06	yes
rs12766112:T	10	104260388	C	T	0.206896	0.903008	0.56 (0.41-0.76)	0.000159131	0.264074	0.909376	0.56 (0.37-0.85)	0.00592898	0.56 (0.44-0.72)	4.71716e-06	yes
rs12570859:T	10	104257226	C	T	0.206889	0.902987	0.56 (0.41-0.76)	0.000159091	0.264069	0.909385	0.56 (0.37-0.85)	0.00593168	0.56 (0.44-0.72)	4.71815e-06	yes
rs7902317:C	10	104266230	G	C	0.206894	0.902987	0.56 (0.41-0.76)	0.000159516	0.264088	0.90939	0.56 (0.37-0.85)	0.00593581	0.56 (0.44-0.72)	4.73205e-06	no
rs2281880:A	10	104269217	G	A	0.206908	0.902979	0.56 (0.41-0.76)	0.000159616	0.265055	0.909602	0.56 (0.37-0.85)	0.00593313	0.56 (0.44-0.72)	4.73271e-06	no
rs7078511:A	10	104283874	C	A	0.20689	0.903103	0.56 (0.41-0.76)	0.000158553	0.263417	0.910157	0.57 (0.38-0.87)	0.00765739	0.56 (0.44-0.72)	5.93509e-06	no
rs7078679:G	10	104284017	C	G	0.20689	0.903103	0.56 (0.41-0.76)	0.000158553	0.263417	0.910157	0.57 (0.38-0.87)	0.00765739	0.56 (0.44-0.72)	5.93509e-06	no
rs11592334:A	10	104278693	G	A	0.206881	0.903089	0.56 (0.41-0.76)	0.000158555	0.263407	0.910206	0.57 (0.38-0.87)	0.00767236	0.56 (0.44-0.72)	5.94545e-06	no
rs12572775:T	10	104285594	A	T	0.208365	0.90452	0.56 (0.41-0.77)	0.000190462	0.26121	0.905856	0.57 (0.38-0.86)	0.00697278	0.57 (0.44-0.72)	6.43302e-06	no
rs144348698:GATAT	10	104287255	G	GATAT	0.138159	0.894155	0.47 (0.32-0.69)	5.11376e-05	0.147093	0.86314	0.72 (0.42-1.22)	0.226053	0.54 (0.4-0.74)	0.000111442	no
rs78814777:A	10	104052859	G	A	0.0686062	0.910834	0.47 (0.28-0.78)	0.00237523	0.116939	0.942949	0.6 (0.37-0.98)	0.0398937	0.53 (0.38-0.76)	0.000478715	no
rs6584507:A	10	104254623	G	A	0.381504	0.954698	1.44 (1.12-1.84)	0.00391724	0.390608	0.953399	1.37 (1.01-1.86)	0.0438295	1.41 (1.16-1.71)	0.000495417	no
rs13287:G	10	104240438	A	G	0.381696	0.954115	1.44 (1.12-1.84)	0.00381085	0.391139	0.954851	1.36 (1-1.85)	0.0465574	1.41 (1.16-1.71)	0.000511605	no
rs12162:G	10	104240498	A	G	0.381591	0.9542	1.44 (1.12-1.84)	0.00390139	0.391483	0.953269	1.36 (1-1.86)	0.0457798	1.41 (1.16-1.71)	0.000513764	no
rs2296579:G	10	104241375	A	G	0.381611	0.95437	1.44 (1.12-1.84)	0.00385474	0.391137	0.95485	1.36 (1-1.85)	0.0465687	1.41 (1.16-1.71)	0.000516821	no
rs2296578:G	10	104240974	C	G	0.381611	0.95437	1.44 (1.12-1.84)	0.00385474	0.391137	0.95485	1.36 (1-1.85)	0.0465693	1.41 (1.16-1.71)	0.000516828	no
rs4408249:A	10	104374653	T	A	0.466168	0.964166	1.38 (1.08-1.76)	0.0104602	0.441572	0.960492	1.43 (1.05-1.95)	0.0203389	1.4 (1.15-1.69)	0.000617302	no
rs3781289:T	10	104244991	G	T	0.381097	0.951217	1.42 (1.11-1.83)	0.00519093	0.39092	0.952297	1.37 (1.01-1.86)	0.043877	1.4 (1.15-1.7)	0.000640882	no
rs10786669:G	10	104256094	C	G	0.378035	0.953926	1.43 (1.12-1.84)	0.00426177	0.389648	0.954491	1.35 (0.99-1.84)	0.0532245	1.4 (1.15-1.7)	0.000644615	no
rs7917525:G	10	104246755	C	G	0.379977	0.954275	1.42 (1.11-1.82)	0.00566325	0.39101	0.952021	1.37 (1.01-1.87)	0.0419669	1.4 (1.15-1.7)	0.000663415	no
rs7358268:T	10	104247589	C	T	0.380228	0.953459	1.42 (1.11-1.82)	0.00542792	0.39066	0.953262	1.37 (1.01-1.86)	0.0441102	1.4 (1.15-1.7)	0.000668608	no
rs35748678:GAA	10	104403085	GA	GAA	0.16636	0.902797	1.49 (1.08-2.06)	0.0132881	0.198865	0.926005	1.63 (1.09-2.43)	0.0150506	1.54 (1.2-1.98)	0.000671157	no
rs10786696:G	10	104378134	A	G	0.457543	0.982905	1.38 (1.08-1.75)	0.00950228	0.431385	0.978756	1.41 (1.04-1.91)	0.0255769	1.39 (1.15-1.68)	0.000685425	no
rs10786697:T	10	104378563	G	T	0.457552	0.982126	1.38 (1.08-1.76)	0.00947388	0.431425	0.977897	1.41 (1.04-1.91)	0.0256789	1.39 (1.15-1.68)	0.000685921	no
rs2001389:A	10	104375258	G	A	0.457538	0.983018	1.38 (1.08-1.75)	0.00951588	0.43138	0.978892	1.41 (1.04-1.91)	0.0255628	1.39 (1.15-1.68)	0.000686034	no
rs10786698:A	10	104378750	G	A	0.457547	0.981831	1.38 (1.08-1.76)	0.00946975	0.431381	0.977736	1.41 (1.04-1.91)	0.025868	1.39 (1.15-1.68)	0.000690021	no
rs11386205:TC	10	104249623	T	TC	0.380018	0.954201	1.42 (1.11-1.82)	0.00562314	0.390667	0.953281	1.37 (1.01-1.86)	0.0440808	1.4 (1.15-1.7)	0.000690256	no
rs7898410:C	10	104245858	T	C	0.380018	0.954201	1.42 (1.11-1.82)	0.00562314	0.390663	0.953266	1.37 (1.01-1.86)	0.0440874	1.4 (1.15-1.7)	0.000690355	no
rs7917158:A	10	104246471	C	A	0.380018	0.954201	1.42 (1.11-1.82)	0.00562314	0.390663	0.953266	1.37 (1.01-1.86)	0.0440874	1.4 (1.15-1.7)	0.000690355	no
rs715439:C	10	104257809	A	C	0.37991	0.954554	1.42 (1.1-1.82)	0.00570432	0.390614	0.953422	1.37 (1.01-1.86)	0.0437928	1.4 (1.15-1.7)	0.00069474	no
rs111446950:C	10	104250209	CT	C	0.379977	0.954274	1.42 (1.11-1.82)	0.00566306	0.390665	0.953281	1.37 (1.01-1.86)	0.0440981	1.4 (1.15-1.7)	0.000695023	no
rs2296588:C	10	104248087	T	C	0.379977	0.954275	1.42 (1.11-1.82)	0.00566325	0.390663	0.953273	1.37 (1.01-1.86)	0.0440981	1.4 (1.15-1.7)	0.000695054	no
rs2296589:A	10	104248106	T	A	0.379977	0.954275	1.42 (1.11-1.82)	0.00566325	0.390663	0.953273	1.37 (1.01-1.86)	0.0440981	1.4 (1.15-1.7)	0.000695054	no
rs2296586:A	10	104245575	G	A	0.379977	0.954275	1.42 (1.11-1.82)	0.00566325	0.390659	0.953258	1.37 (1.01-1.86)	0.0441047	1.4 (1.15-1.7)	0.000695154	no
rs12265877:G	10	104247247	C	G	0.379977	0.954275	1.42 (1.11-1.82)	0.00566325	0.390661	0.953266	1.37 (1.01-1.86)	0.0441047	1.4 (1.15-1.7)	0.000695154	no
rs7358266:G	10	104247463	A	G	0.379977	0.954275	1.42 (1.11-1.82)	0.00566325	0.390661	0.953266	1.37 (1.01-1.86)	0.0441047	1.4 (1.15-1.7)	0.000695154	no
rs11191300:C	10	104247485	T	C	0.379977	0.954275	1.42 (1.11-1.82)	0.00566325	0.390661	0.953266	1.37 (1.01-1.86)	0.0441047	1.4 (1.15-1.7)	0.000695154	no
rs2296583:G	10	104244322	T	G	0.379977	0.954275	1.42 (1.11-1.82)	0.00566325	0.390657	0.953254	1.37 (1.01-1.86)	0.0441096	1.4 (1.15-1.7)	0.000695216	no
rs2296584:A	10	104244323	T	A	0.379977	0.954275	1.42 (1.11-1.82)	0.00566325	0.390657	0.953254	1.37 (1.01-1.86)	0.0441096	1.4 (1.15-1.7)	0.000695216	no
rs61873733:A	10	104251458	G	A	0.379901	0.954567	1.42 (1.1-1.82)	0.00573679	0.39062	0.953337	1.37 (1.01-1.86)	0.04372	1.4 (1.15-1.7)	0.000697291	no
rs11191299:T	10	104247481	C	T	0.379965	0.954333	1.42 (1.1-1.82)	0.00568484	0.390651	0.95332	1.37 (1.01-1.86)	0.0441665	1.4 (1.15-1.7)	0.000698434	no
rs7093028:G	10	104259417	A	G	0.379869	0.954627	1.42 (1.1-1.82)	0.00574476	0.390613	0.953425	1.37 (1.01-1.86)	0.0438099	1.4 (1.15-1.7)	0.000699521	no
rs7069356:C	10	104254359	G	C	0.379869	0.954627	1.42 (1.1-1.82)	0.00574476	0.390607	0.953395	1.37 (1.01-1.86)	0.0438295	1.4 (1.15-1.7)	0.000699806	no
rs6584506:C	10	104254428	T	C	0.379869	0.954627	1.42 (1.1-1.82)	0.00574476	0.390607	0.953395	1.37 (1.01-1.86)	0.0438295	1.4 (1.15-1.7)	0.000699806	no
rs7898507:G	10	104255106	C	G	0.379869	0.954627	1.42 (1.1-1.82)	0.00574476	0.390608	0.953399	1.37 (1.01-1.86)	0.0438295	1.4 (1.15-1.7)	0.000699806	no
rs11191303:C	10	104255158	T	C	0.379869	0.954627	1.42 (1.1-1.82)	0.00574476	0.390608	0.953399	1.37 (1.01-1.86)	0.0438295	1.4 (1.15-1.7)	0.000699806	no
rs11191304:T	10	104255284	C	T	0.379869	0.954627	1.42 (1.1-1.82)	0.00574476	0.390608	0.953399	1.37 (1.01-1.86)	0.0438295	1.4 (1.15-1.7)	0.000699806	no
rs11191305:T	10	104255434	C	T	0.379869	0.954627	1.42 (1.1-1.82)	0.00574476	0.390608	0.953399	1.37 (1.01-1.86)	0.0438295	1.4 (1.15-1.7)	0.000699806	no
rs7475806:T	10	104255813	C	T	0.379869	0.954627	1.42 (1.1-1.82)	0.00574476	0.390608	0.953399	1.37 (1.01-1.86)	0.0438295	1.4 (1.15-1.7)	0.000699806	no
rs6584504:C	10	104253507	T	C	0.379869	0.954625	1.42 (1.1-1.82)	0.0057449	0.390606	0.953391	1.37 (1.01-1.86)	0.0438295	1.4 (1.15-1.7)	0.000699822	no
rs7917402:T	10	104246690	C	T	0.382905	0.955628	1.39 (1.09-1.78)	0.00859316	0.394946	0.952372	1.4 (1.03-1.91)	0.0302232	1.39 (1.15-1.69)	0.000725122	no
rs3781290:C	10	104244948	G	C	0.380547	0.95217	1.41 (1.1-1.81)	0.00596088	0.390836	0.952738	1.37 (1.01-1.86)	0.0439231	1.4 (1.15-1.69)	0.000725568	no
rs2031602:C	10	104307955	G	C	0.378411	0.957032	1.43 (1.12-1.83)	0.00418785	0.385717	0.962587	1.34 (0.98-1.82)	0.061409	1.39 (1.15-1.69)	0.000728284	no
rs2031601:G	10	104308064	T	G	0.378425	0.957025	1.43 (1.12-1.83)	0.00419876	0.385717	0.962625	1.34 (0.98-1.82)	0.0614405	1.39 (1.15-1.69)	0.000730302	no
rs7893954:G	10	104318966	A	G	0.458389	0.978283	1.36 (1.07-1.73)	0.0126414	0.435228	0.968455	1.44 (1.06-1.96)	0.0194923	1.39 (1.15-1.68)	0.00073079	no
rs11191330:T	10	104306160	G	T	0.37841	0.956945	1.43 (1.12-1.83)	0.00420198	0.385718	0.961811	1.34 (0.98-1.82)	0.0619125	1.39 (1.15-1.69)	0.000736342	no
rs7902306:T	10	104290462	C	T	0.377275	0.9558	1.43 (1.12-1.84)	0.00412345	0.38126	0.956281	1.34 (0.98-1.82)	0.0646262	1.4 (1.15-1.69)	0.000753882	no
rs11191328:T	10	104305185	C	T	0.378277	0.956398	1.43 (1.12-1.83)	0.00421599	0.385527	0.958483	1.33 (0.98-1.81)	0.0660839	1.39 (1.15-1.69)	0.000788187	no
rs2296590:A	10	104262628	G	A	0.378212	0.954504	1.43 (1.12-1.83)	0.00441583	0.386012	0.95787	1.33 (0.98-1.81)	0.0672994	1.39 (1.15-1.69)	0.000837261	no
rs3818470:C	10	104263675	T	C	0.378212	0.954504	1.43 (1.12-1.83)	0.00441583	0.385048	0.957831	1.33 (0.98-1.81)	0.0672994	1.39 (1.15-1.69)	0.000837261	no
rs3808934:T	10	104264280	C	T	0.378212	0.954504	1.43 (1.12-1.83)	0.00441583	0.385048	0.957831	1.33 (0.98-1.81)	0.0672994	1.39 (1.15-1.69)	0.000837261	no
rs72188075:G	10	104270895	GTAA	G	0.378213	0.954512	1.43 (1.12-1.83)	0.00441617	0.38505	0.957824	1.33 (0.98-1.81)	0.0673026	1.39 (1.15-1.69)	0.000837359	no
rs10786671:A	10	104271303	G	A	0.378213	0.954512	1.43 (1.12-1.83)	0.00441617	0.38505	0.957824	1.33 (0.98-1.81)	0.0673026	1.39 (1.15-1.69)	0.000837359	no
rs10883728:A	10	104269301	G	A	0.378212	0.954509	1.43 (1.12-1.83)	0.0044169	0.38505	0.957824	1.33 (0.98-1.81)	0.0673026	1.39 (1.15-1.69)	0.000837451	no
rs2281879:C	10	104268877	G	C	0.378227	0.954524	1.43 (1.12-1.83)	0.00443106	0.385055	0.957824	1.33 (0.98-1.81)	0.0672784	1.39 (1.15-1.69)	0.00083946	no
rs11191327:C	10	104303883	T	C	0.378103	0.955829	1.43 (1.12-1.83)	0.00424713	0.385287	0.958065	1.32 (0.97-1.8)	0.0723351	1.39 (1.14-1.68)	0.000869383	no
rs111763415:TTTTG	10	104330296	T	TTTTG	0.485886	0.975214	1.44 (1.13-1.83)	0.00316916	0.445921	0.965012	1.29 (0.95-1.75)	0.0974111	1.38 (1.14-1.67)	0.000914052	no
rs112785939:G	10	104338635	GA	G	0.459344	0.96664	1.35 (1.06-1.73)	0.0156851	0.434017	0.957746	1.44 (1.06-1.97)	0.0197764	1.39 (1.14-1.68)	0.000918031	no
rs6584508:G	10	104258567	A	G	0.381956	0.948138	1.41 (1.1-1.81)	0.00631212	0.394155	0.945791	1.35 (0.99-1.84)	0.0539619	1.39 (1.14-1.69)	0.000927187	no
rs7893155:A	10	104294228	C	A	0.378027	0.955467	1.43 (1.12-1.84)	0.00425107	0.38512	0.960555	1.32 (0.97-1.79)	0.0774086	1.38 (1.14-1.68)	0.000933059	no
rs7914389:C	10	104295402	T	C	0.378027	0.955469	1.43 (1.12-1.84)	0.00425108	0.385119	0.960549	1.32 (0.97-1.79)	0.0774156	1.38 (1.14-1.68)	0.000933151	no
rs10883732:A	10	104293461	G	A	0.378028	0.955466	1.43 (1.12-1.84)	0.00425178	0.38512	0.960555	1.32 (0.97-1.79)	0.0774086	1.38 (1.14-1.68)	0.000933183	no
rs10748825:G	10	104293609	A	G	0.378034	0.955438	1.43 (1.12-1.84)	0.00425661	0.38512	0.960555	1.32 (0.97-1.79)	0.0774086	1.38 (1.14-1.68)	0.000934146	no
rs11191326:T	10	104302959	C	T	0.377986	0.955568	1.43 (1.12-1.83)	0.00427184	0.385114	0.96051	1.32 (0.97-1.79)	0.0773937	1.38 (1.14-1.68)	0.000936693	no
rs61871069:G	10	104302127	A	G	0.377986	0.955568	1.43 (1.12-1.83)	0.00427184	0.385113	0.960522	1.32 (0.97-1.79)	0.0774023	1.38 (1.14-1.68)	0.000936782	no
rs7915589:A	10	104299264	G	A	0.377986	0.955568	1.43 (1.12-1.83)	0.00427184	0.385114	0.960525	1.32 (0.97-1.79)	0.0774204	1.38 (1.14-1.68)	0.000937031	no
rs7100753:T	10	104300979	C	T	0.377986	0.955568	1.43 (1.12-1.83)	0.00427184	0.385114	0.960525	1.32 (0.97-1.79)	0.0774204	1.38 (1.14-1.68)	0.000937031	no
rs7087665:C	10	104282418	T	C	0.378243	0.954583	1.43 (1.12-1.83)	0.00439189	0.385751	0.958649	1.32 (0.97-1.79)	0.0769734	1.38 (1.14-1.68)	0.000953727	no
rs1409310:C	10	104282265	T	C	0.378237	0.954581	1.43 (1.12-1.83)	0.00439509	0.385749	0.958638	1.32 (0.97-1.79)	0.0769761	1.38 (1.14-1.68)	0.000954413	no
rs7074343:A	10	104283165	G	A	0.378237	0.954581	1.43 (1.12-1.83)	0.00439509	0.385749	0.958638	1.32 (0.97-1.79)	0.0769761	1.38 (1.14-1.68)	0.000954413	no
rs10786673:A	10	104280537	G	A	0.378238	0.954582	1.43 (1.12-1.83)	0.00439505	0.385749	0.958654	1.32 (0.97-1.79)	0.0770024	1.38 (1.14-1.68)	0.000954721	no
rs7090276:T	10	104281239	G	T	0.378237	0.954581	1.43 (1.12-1.83)	0.00439509	0.385749	0.958654	1.32 (0.97-1.79)	0.0770024	1.38 (1.14-1.68)	0.000954742	no
rs7912901:C	10	104277440	T	C	0.378236	0.954586	1.43 (1.12-1.83)	0.00439688	0.385747	0.958649	1.32 (0.97-1.79)	0.0769825	1.38 (1.14-1.68)	0.000954824	no
rs7094366:G	10	104274730	C	G	0.378236	0.954584	1.43 (1.12-1.83)	0.00439684	0.385746	0.958661	1.32 (0.97-1.79)	0.076994	1.38 (1.14-1.68)	0.000954988	no
rs61869601:C	10	104276802	T	C	0.378236	0.954584	1.43 (1.12-1.83)	0.00439684	0.385746	0.958661	1.32 (0.97-1.79)	0.076994	1.38 (1.14-1.68)	0.000954988	no
rs1884929:T	10	104275418	C	T	0.378237	0.954586	1.43 (1.12-1.83)	0.00439752	0.385746	0.958661	1.32 (0.97-1.79)	0.076994	1.38 (1.14-1.68)	0.000955114	no
rs9665632:A	10	104300640	G	A	0.377986	0.955568	1.43 (1.12-1.83)	0.00427184	0.385372	0.959548	1.31 (0.97-1.79)	0.0789592	1.38 (1.14-1.68)	0.000955623	no
rs7908249:G	10	104373300	A	G	0.458784	0.985933	1.36 (1.07-1.73)	0.0126746	0.43371	0.981567	1.4 (1.03-1.9)	0.0278568	1.38 (1.14-1.66)	0.00097408	no
rs4604806:A	10	104373904	G	A	0.45879	0.984237	1.36 (1.07-1.73)	0.0126055	0.433748	0.979843	1.4 (1.03-1.9)	0.0282583	1.38 (1.14-1.66)	0.000981156	no
rs7907760:T	10	104345197	C	T	0.459017	0.986743	1.36 (1.07-1.73)	0.0129026	0.433779	0.981704	1.4 (1.03-1.9)	0.027917	1.37 (1.14-1.66)	0.000993095	no
rs11191352:G	10	104372244	A	G	0.45902	0.986726	1.36 (1.07-1.73)	0.0129059	0.433778	0.981701	1.4 (1.03-1.9)	0.0279218	1.37 (1.14-1.66)	0.000993475	no
rs10883736:T	10	104320029	G	T	0.459016	0.986759	1.36 (1.07-1.73)	0.0129107	0.437431	0.980963	1.4 (1.03-1.9)	0.02792	1.37 (1.14-1.66)	0.000993753	no
rs10786683:A	10	104320476	G	A	0.459016	0.986759	1.36 (1.07-1.73)	0.0129107	0.43735	0.980675	1.4 (1.03-1.9)	0.02792	1.37 (1.14-1.66)	0.000993753	no
rs7912339:C	10	104373758	G	C	0.459026	0.985036	1.36 (1.07-1.73)	0.012827	0.433817	0.979974	1.4 (1.03-1.9)	0.0283145	1.37 (1.14-1.66)	0.000999689	no
rs200553041:A	10	104374652	AT	A	0.462564	0.975679	1.36 (1.06-1.73)	0.0135731	0.433682	0.972503	1.41 (1.04-1.91)	0.026478	1.38 (1.14-1.67)	0.00100153	no
rs112325593:CT	10	104291716	C	CT	0.369702	0.932415	1.44 (1.11-1.86)	0.00485714	0.383361	0.921136	1.33 (0.97-1.82)	0.0742721	1.39 (1.14-1.7)	0.00101198	no
rs10748824:C	10	104274466	T	C	0.378656	0.953433	1.43 (1.11-1.83)	0.00479441	0.385748	0.958653	1.32 (0.97-1.79)	0.0769649	1.38 (1.14-1.68)	0.00102909	no
rs7094751:A	10	104274818	G	A	0.378656	0.953433	1.43 (1.11-1.83)	0.00479441	0.386177	0.957666	1.32 (0.97-1.79)	0.0769719	1.38 (1.14-1.68)	0.00102918	no
rs10748823:G	10	104274465	C	G	0.378658	0.953431	1.43 (1.11-1.83)	0.00479608	0.385748	0.958653	1.32 (0.97-1.79)	0.0769649	1.38 (1.14-1.68)	0.00102936	no
rs7074444:G	10	104249922	A	G	0.384243	0.953399	1.39 (1.08-1.77)	0.00952983	0.392158	0.950021	1.38 (1.01-1.88)	0.0405881	1.38 (1.14-1.68)	0.0010407	no
rs7092622:G	10	104249919	T	G	0.384232	0.9534	1.38 (1.08-1.77)	0.00955252	0.392155	0.950017	1.38 (1.01-1.88)	0.0406044	1.38 (1.14-1.68)	0.00104339	no
rs7898166:G	10	104349962	A	G	0.459864	0.986624	1.35 (1.06-1.73)	0.014065	0.435609	0.977157	1.41 (1.04-1.91)	0.0269106	1.37 (1.14-1.66)	0.00104952	no
rs10736158:G	10	104370023	A	G	0.460095	0.985769	1.35 (1.06-1.73)	0.0140248	0.433944	0.981253	1.4 (1.04-1.9)	0.0275602	1.37 (1.14-1.66)	0.00106551	no
rs10786685:A	10	104323103	G	A	0.459715	0.98629	1.35 (1.06-1.72)	0.0147378	0.436381	0.979159	1.41 (1.04-1.9)	0.02606	1.37 (1.14-1.66)	0.00106591	no
rs7091252:T	10	104328859	G	T	0.459708	0.986311	1.35 (1.06-1.72)	0.0147266	0.435334	0.977802	1.41 (1.04-1.9)	0.0260927	1.37 (1.14-1.66)	0.00106624	no
rs5787466:T	10	104327865	TC	T	0.459708	0.986315	1.35 (1.06-1.72)	0.0147293	0.435515	0.977882	1.41 (1.04-1.9)	0.0260927	1.37 (1.14-1.66)	0.00106642	no
rs729023:T	10	104341887	C	T	0.459895	0.98651	1.35 (1.06-1.73)	0.0143127	0.433819	0.981738	1.4 (1.03-1.9)	0.0279307	1.37 (1.13-1.66)	0.00109914	no
rs61869602:C	10	104278306	T	C	0.147819	0.937119	0.54 (0.38-0.76)	0.000351482	0.139103	0.906089	0.84 (0.49-1.42)	0.510122	0.61 (0.46-0.82)	0.00111124	no
rs12357886:G	10	104337945	A	G	0.459837	0.986753	1.35 (1.06-1.72)	0.0145263	0.434205	0.980331	1.4 (1.03-1.9)	0.027937	1.37 (1.13-1.66)	0.00111515	no
rs10883743:C	10	104338389	T	C	0.459837	0.986753	1.35 (1.06-1.72)	0.0145263	0.434124	0.980601	1.4 (1.03-1.9)	0.027937	1.37 (1.13-1.66)	0.00111515	no
rs729024:C	10	104341975	T	C	0.459835	0.986746	1.35 (1.06-1.72)	0.0145308	0.433819	0.981738	1.4 (1.03-1.9)	0.0279307	1.37 (1.13-1.66)	0.0011153	no
rs6584513:A	10	104334645	G	A	0.459836	0.986756	1.35 (1.06-1.72)	0.0145289	0.434804	0.978766	1.4 (1.03-1.9)	0.027942	1.37 (1.13-1.66)	0.00111551	no
rs6584512:G	10	104329685	A	G	0.459834	0.986762	1.35 (1.06-1.72)	0.0145349	0.435707	0.977843	1.4 (1.03-1.9)	0.027942	1.37 (1.13-1.66)	0.00111597	no
rs7906115:G	10	104327164	A	G	0.459836	0.986769	1.35 (1.06-1.72)	0.0145353	0.436166	0.978033	1.4 (1.03-1.9)	0.027942	1.37 (1.13-1.66)	0.00111601	no
rs3862030:G	10	104327584	A	G	0.459836	0.986769	1.35 (1.06-1.72)	0.0145353	0.436089	0.97797	1.4 (1.03-1.9)	0.027942	1.37 (1.13-1.66)	0.00111601	no
rs7087984:A	10	104380686	G	A	0.455443	0.976159	1.36 (1.07-1.74)	0.0122513	0.428965	0.970056	1.39 (1.02-1.89)	0.03393	1.37 (1.13-1.66)	0.00111961	no
rs12241531:A	10	104407792	G	A	0.169577	0.912723	1.44 (1.05-1.97)	0.0230468	0.200233	0.927299	1.63 (1.09-2.43)	0.0143097	1.51 (1.18-1.93)	0.00112983	no
rs181319206:C	10	104048237	G	C	0.065138	0.908228	0.51 (0.3-0.85)	0.00708371	0.112995	0.931343	0.6 (0.36-0.99)	0.0434812	0.55 (0.39-0.79)	0.00114156	no
rs11593971:G	10	104234090	C	G	0.528696	0.968934	0.69 (0.54-0.87)	0.00205334	0.545493	0.958934	0.81 (0.6-1.09)	0.167861	0.73 (0.61-0.88)	0.00116655	no
rs3740406:T	10	104272789	C	T	0.37987	0.954631	1.42 (1.1-1.82)	0.00570178	0.387476	0.954161	1.32 (0.97-1.8)	0.0756188	1.38 (1.14-1.67)	0.00117346	no
10:104265795:TG	10	104265795	T	TG	0.377179	0.952574	1.43 (1.11-1.83)	0.00478885	0.379463	0.949947	1.31 (0.96-1.78)	0.0890298	1.38 (1.14-1.67)	0.00118503	no
rs4919661:C	10	104358403	T	C	0.460653	0.986719	1.35 (1.06-1.72)	0.0161294	0.435536	0.977281	1.41 (1.04-1.91)	0.0269059	1.37 (1.13-1.66)	0.00120023	no
rs4917975:G	10	104358407	C	G	0.460653	0.986719	1.35 (1.06-1.72)	0.0161294	0.435536	0.977281	1.41 (1.04-1.91)	0.0269059	1.37 (1.13-1.66)	0.00120023	no
rs4917976:T	10	104360518	C	T	0.460653	0.986719	1.35 (1.06-1.72)	0.0161294	0.435536	0.977281	1.41 (1.04-1.91)	0.0269059	1.37 (1.13-1.66)	0.00120023	no
rs10786691:A	10	104364652	G	A	0.460653	0.986717	1.35 (1.06-1.72)	0.0161294	0.435536	0.977281	1.41 (1.04-1.91)	0.0269059	1.37 (1.13-1.66)	0.00120023	no
rs10444069:C	10	104346166	T	C	0.460651	0.986724	1.35 (1.06-1.72)	0.0161299	0.435536	0.977281	1.41 (1.04-1.91)	0.0269059	1.37 (1.13-1.66)	0.00120029	no
rs10786689:C	10	104356359	T	C	0.460652	0.986719	1.35 (1.06-1.72)	0.0161314	0.435536	0.977281	1.41 (1.04-1.91)	0.0269059	1.37 (1.13-1.66)	0.00120037	no
rs10786695:C	10	104368756	A	C	0.460652	0.986715	1.35 (1.06-1.72)	0.0161324	0.435536	0.977281	1.41 (1.04-1.91)	0.0269059	1.37 (1.13-1.66)	0.00120045	no
rs10786680:C	10	104317192	T	C	0.46065	0.986739	1.35 (1.06-1.72)	0.0161397	0.439388	0.977333	1.41 (1.04-1.91)	0.0269033	1.37 (1.13-1.66)	0.00120087	no
rs10786681:T	10	104317357	G	T	0.46065	0.986739	1.35 (1.06-1.72)	0.0161397	0.439388	0.977333	1.41 (1.04-1.91)	0.0269033	1.37 (1.13-1.66)	0.00120087	no
rs11341508:T	10	104319127	TC	T	0.460653	0.98673	1.35 (1.06-1.72)	0.0161459	0.43936	0.97721	1.41 (1.04-1.91)	0.0269088	1.37 (1.13-1.66)	0.00120153	no
rs4917977:T	10	104363119	C	T	0.460653	0.986717	1.35 (1.06-1.72)	0.0161294	0.435522	0.977226	1.41 (1.04-1.91)	0.026955	1.37 (1.13-1.66)	0.00120206	no
rs4919664:C	10	104363408	A	C	0.460653	0.986717	1.35 (1.06-1.72)	0.0161294	0.435522	0.977226	1.41 (1.04-1.91)	0.026955	1.37 (1.13-1.66)	0.00120206	no
rs3839934:CCATTT	10	104352124	C	CCATTT	0.460677	0.986628	1.35 (1.06-1.72)	0.0161984	0.435571	0.977139	1.41 (1.04-1.91)	0.0269003	1.37 (1.13-1.66)	0.00120509	no
rs10748826:C	10	104354804	T	C	0.460677	0.986628	1.35 (1.06-1.72)	0.0161984	0.435571	0.977139	1.41 (1.04-1.91)	0.0269003	1.37 (1.13-1.66)	0.00120509	no
rs1056744:G	10	104236687	A	G	0.528159	0.969912	0.69 (0.54-0.88)	0.0022442	0.545101	0.960844	0.81 (0.6-1.09)	0.16509	0.73 (0.61-0.89)	0.00123063	no
rs12569526:G	10	104237007	A	G	0.528235	0.970337	0.69 (0.54-0.88)	0.00224298	0.545091	0.961121	0.81 (0.6-1.09)	0.165181	0.73 (0.61-0.89)	0.00123073	no
rs35645620:TA	10	104242537	T	TA	0.34735	0.900704	1.39 (1.07-1.8)	0.0131265	0.385232	0.89254	1.41 (1.02-1.95)	0.0350085	1.4 (1.14-1.71)	0.0012434	no
rs10786684:T	10	104323028	G	T	0.46065	0.986739	1.35 (1.06-1.72)	0.0161397	0.438355	0.974025	1.4 (1.03-1.9)	0.0280597	1.37 (1.13-1.65)	0.00124405	no
rs12260465:C	10	104432805	G	C	0.160068	0.88981	1.45 (1.05-2)	0.0230056	0.192519	0.911209	1.63 (1.08-2.46)	0.0162123	1.52 (1.18-1.96)	0.00125321	no
rs58442124:C	10	104202251	CT	C	0.889735	0.705127	0.4 (0.25-0.64)	4.79877e-05	0.863867	0.779844	0.86 (0.53-1.39)	0.522562	0.58 (0.41-0.81)	0.00130943	no
rs4146426:T	10	104404335	A	T	0.170301	0.912142	1.43 (1.04-1.95)	0.0265541	0.200467	0.927808	1.63 (1.09-2.43)	0.0143803	1.5 (1.17-1.92)	0.00131238	no
rs7075269:A	10	104365724	G	A	0.461472	0.986726	1.34 (1.05-1.71)	0.018108	0.435574	0.97731	1.41 (1.04-1.91)	0.0269246	1.37 (1.13-1.65)	0.00134596	no
rs4917978:C	10	104366353	T	C	0.461472	0.986726	1.34 (1.05-1.71)	0.018108	0.435574	0.97731	1.41 (1.04-1.91)	0.0269246	1.37 (1.13-1.65)	0.00134596	no
rs10883744:G	10	104347247	A	G	0.461471	0.986734	1.34 (1.05-1.71)	0.0181083	0.435574	0.97731	1.41 (1.04-1.91)	0.026924	1.37 (1.13-1.65)	0.00134597	no
rs10883738:C	10	104321721	T	C	0.461463	0.986723	1.34 (1.05-1.71)	0.0181093	0.438912	0.97554	1.41 (1.04-1.91)	0.0269302	1.37 (1.13-1.65)	0.00134637	no
rs11394237:TA	10	104369039	T	TA	0.461472	0.986723	1.34 (1.05-1.71)	0.018114	0.435574	0.97731	1.41 (1.04-1.91)	0.0269246	1.37 (1.13-1.65)	0.00134643	no
rs4917973:T	10	104333700	C	T	0.461469	0.986739	1.34 (1.05-1.71)	0.0181152	0.436731	0.974042	1.41 (1.04-1.91)	0.0269302	1.37 (1.13-1.65)	0.00134681	no
rs4919663:C	10	104363293	T	C	0.461472	0.986727	1.34 (1.05-1.71)	0.0181078	0.435561	0.977256	1.41 (1.04-1.91)	0.0269731	1.37 (1.13-1.65)	0.00134797	no
rs7072723:A	10	104349483	G	A	0.461496	0.986637	1.34 (1.05-1.71)	0.0181842	0.43561	0.977169	1.41 (1.04-1.91)	0.0269184	1.37 (1.13-1.65)	0.00135131	no
rs12411442:G	10	104349531	A	G	0.461496	0.986637	1.34 (1.05-1.71)	0.0181842	0.43561	0.977169	1.41 (1.04-1.91)	0.0269184	1.37 (1.13-1.65)	0.00135131	no
rs115039829:C	10	104147705	A	C	0.147223	0.916247	0.61 (0.43-0.86)	0.0045724	0.215716	0.925927	0.71 (0.48-1.06)	0.0906738	0.65 (0.5-0.85)	0.00135452	no
rs3936017:C	10	104354424	T	C	0.461408	0.986308	1.34 (1.05-1.71)	0.0182143	0.435504	0.976766	1.41 (1.04-1.91)	0.0269901	1.37 (1.13-1.65)	0.00135671	no
rs11389840:CA	10	104295241	C	CA	0.339741	0.887107	1.38 (1.06-1.79)	0.015081	0.348701	0.892675	1.43 (1.03-2)	0.0325263	1.4 (1.14-1.72)	0.00137098	no
rs7090034:G	10	104281155	C	G	0.379847	0.954728	1.42 (1.11-1.82)	0.00567216	0.388858	0.952547	1.3 (0.96-1.78)	0.0892564	1.37 (1.13-1.66)	0.00137948	no
rs4919665:C	10	104366042	T	C	0.463085	0.983037	1.34 (1.05-1.71)	0.0190182	0.436441	0.974356	1.41 (1.04-1.91)	0.0265109	1.36 (1.13-1.65)	0.00140001	no
rs7907417:C	10	104370662	T	C	0.508837	0.992499	0.7 (0.55-0.9)	0.00396778	0.544206	0.987845	0.79 (0.59-1.07)	0.121109	0.74 (0.61-0.89)	0.00140465	no
rs10786678:T	10	104313395	C	T	0.425831	0.986584	1.36 (1.07-1.73)	0.0111711	0.423479	0.973992	1.35 (1-1.82)	0.0501189	1.36 (1.12-1.64)	0.00144392	no
rs33942579:CT	10	104288718	C	CT	0.0720196	0.773736	0.72 (0.43-1.21)	0.21123	0.152655	0.844398	0.32 (0.17-0.6)	0.000191844	0.52 (0.35-0.78)	0.00150101	no
rs7088470:G	10	104434194	A	G	0.162282	0.885483	1.43 (1.04-1.98)	0.0276519	0.193012	0.905091	1.64 (1.09-2.47)	0.0160877	1.51 (1.17-1.94)	0.00151593	no
rs10883739:G	10	104331986	A	G	0.493234	0.991578	1.4 (1.1-1.78)	0.00622117	0.452015	0.976584	1.29 (0.96-1.75)	0.0921003	1.36 (1.12-1.64)	0.00153405	no
rs76665733:C	10	104367987	CA	C	0.433922	0.92409	1.32 (1.03-1.71)	0.029689	0.411918	0.919869	1.48 (1.07-2.04)	0.0162841	1.38 (1.13-1.69)	0.00153412	no
rs10883753:T	10	104372441	C	T	0.456454	0.982834	1.34 (1.05-1.71)	0.0166362	0.431325	0.97688	1.38 (1.02-1.88)	0.0351462	1.36 (1.12-1.64)	0.00154839	no
rs142843900:GGGA	10	104404159	G	GGGA	0.171619	0.9137	1.4 (1.02-1.91)	0.035236	0.201392	0.924141	1.65 (1.11-2.46)	0.0120881	1.49 (1.16-1.91)	0.00156835	no
rs11191315:C	10	104279973	T	C	0.311503	0.875568	1.4 (1.07-1.84)	0.0134992	0.334406	0.868174	1.4 (1-1.96)	0.0475421	1.4 (1.14-1.73)	0.00169562	no
rs7070591:C	10	104277123	A	C	0.144351	0.938713	0.53 (0.37-0.76)	0.000316372	0.126651	0.933204	0.9 (0.52-1.55)	0.709356	0.62 (0.46-0.84)	0.00175235	no
rs12762934:T	10	104359884	C	T	0.146006	0.920253	0.54 (0.38-0.77)	0.000517082	0.130914	0.930973	0.86 (0.51-1.47)	0.58094	0.62 (0.46-0.84)	0.00183595	no
rs12767683:A	10	104316581	C	A	0.145995	0.920249	0.54 (0.38-0.77)	0.000517119	0.130909	0.930982	0.86 (0.51-1.47)	0.581027	0.62 (0.46-0.84)	0.00183657	no
rs113422568:A	10	104337938	G	A	0.146002	0.920259	0.54 (0.38-0.77)	0.000517893	0.130911	0.930974	0.86 (0.51-1.47)	0.581048	0.62 (0.46-0.84)	0.00183852	no
rs10786687:C	10	104336994	A	C	0.459014	0.981779	1.36 (1.07-1.74)	0.0124442	0.441126	0.968727	1.34 (0.99-1.81)	0.0585526	1.35 (1.12-1.64)	0.00184219	no
rs7475335:A	10	104343428	C	A	0.15205	0.925802	0.55 (0.39-0.78)	0.00054571	0.131481	0.929814	0.86 (0.51-1.46)	0.580701	0.63 (0.47-0.84)	0.0018422	no
rs11591571:A	10	104342804	G	A	0.15205	0.925802	0.55 (0.39-0.78)	0.00054571	0.131481	0.92981	0.86 (0.51-1.46)	0.580787	0.63 (0.47-0.84)	0.0018426	no
rs10786682:T	10	104318322	G	T	0.454413	0.984812	1.33 (1.04-1.7)	0.0211637	0.433588	0.979368	1.39 (1.02-1.88)	0.032892	1.35 (1.12-1.64)	0.00184993	no
rs139901931:A	10	104270217	G	A	0.14435	0.938711	0.53 (0.37-0.76)	0.000316196	0.127082	0.936578	0.91 (0.53-1.57)	0.738876	0.62 (0.46-0.84)	0.00190438	no
rs11598092:C	10	104274329	G	C	0.144351	0.938713	0.53 (0.37-0.76)	0.000316297	0.127069	0.936694	0.91 (0.53-1.57)	0.74042	0.62 (0.46-0.84)	0.00191214	no
rs7910191:T	10	104385622	C	T	0.0417439	0.807152	0.63 (0.32-1.24)	0.173283	0.11638	0.868996	0.25 (0.11-0.58)	0.000429355	0.44 (0.26-0.74)	0.00193204	no
rs142125496:A	10	104299191	ATTGT	A	0.146709	0.935907	0.53 (0.37-0.76)	0.000327088	0.128175	0.934589	0.91 (0.53-1.57)	0.739678	0.63 (0.47-0.84)	0.00193454	no
rs7907090:A	10	104385398	G	A	0.0417365	0.807224	0.63 (0.32-1.24)	0.173426	0.117332	0.869861	0.25 (0.11-0.58)	0.000430194	0.44 (0.26-0.74)	0.00193575	no
rs12770498:A	10	104304667	G	A	0.148812	0.92943	0.54 (0.38-0.77)	0.000419027	0.129614	0.930247	0.89 (0.52-1.52)	0.671081	0.63 (0.47-0.84)	0.00193632	no
rs67264950:G	10	104335770	GT	G	0.463905	0.956404	1.36 (1.06-1.74)	0.0143145	0.444815	0.9497	1.35 (0.99-1.84)	0.0540418	1.36 (1.12-1.64)	0.00196071	no
rs7096601:C	10	104432024	T	C	0.160679	0.894049	1.41 (1.02-1.94)	0.0365906	0.192562	0.911716	1.64 (1.09-2.46)	0.0156114	1.49 (1.16-1.92)	0.0019702	no
rs113678252:C	10	104310499	CT	C	0.620763	0.781989	1.24 (0.95-1.62)	0.105957	0.55061	0.787989	1.72 (1.2-2.45)	0.00228369	1.4 (1.13-1.73)	0.00210515	no
rs71474568:TTG	10	104348848	T	TTG	0.153694	0.92237	0.55 (0.39-0.78)	0.000603599	0.132972	0.917511	0.87 (0.51-1.48)	0.610199	0.63 (0.47-0.85)	0.00211325	no
rs200811698:C	10	104275882	CTTT	C	0.340549	0.873396	1.41 (1.08-1.84)	0.0101436	0.38222	0.845099	1.33 (0.96-1.85)	0.0884686	1.38 (1.12-1.7)	0.00229383	no
rs12261409:A	10	104428314	G	A	0.170998	0.904423	1.39 (1.01-1.9)	0.041514	0.197442	0.915842	1.61 (1.08-2.42)	0.0179055	1.47 (1.14-1.88)	0.00248225	no
rs60621329:C	10	104428391	CA	C	0.170994	0.904387	1.39 (1.01-1.9)	0.0415303	0.197441	0.915826	1.61 (1.08-2.42)	0.0179264	1.47 (1.14-1.88)	0.00248534	no
rs5787463:C	10	104290839	CAA	C	0.469227	0.838846	0.78 (0.6-1.02)	0.0638294	0.47268	0.833546	0.64 (0.45-0.9)	0.00980783	0.73 (0.59-0.9)	0.00271455	no
rs11595170:C	10	104339851	T	C	0.491816	0.993696	0.75 (0.59-0.95)	0.0152969	0.517825	0.982643	0.76 (0.56-1.03)	0.0737463	0.75 (0.63-0.91)	0.00273503	no
rs61197168:C	10	104257847	CA	C	0.401928	0.921574	1.36 (1.06-1.75)	0.0145878	0.416337	0.912211	1.32 (0.97-1.8)	0.0771264	1.35 (1.11-1.64)	0.00276813	no
rs114927933:T	10	104090311	C	T	0.0907854	0.942089	0.63 (0.42-0.96)	0.0288561	0.162077	0.95192	0.64 (0.41-0.98)	0.0391289	0.64 (0.47-0.86)	0.00292066	no
rs7341995:A	10	104223831	G	A	0.484969	0.957916	0.7 (0.55-0.9)	0.00410849	0.497024	0.93872	0.83 (0.61-1.13)	0.234437	0.75 (0.62-0.91)	0.00293804	no
rs35095897:C	10	104377759	T	C	0.494304	0.985302	0.75 (0.59-0.95)	0.0150485	0.522506	0.973679	0.77 (0.56-1.04)	0.0837526	0.75 (0.63-0.91)	0.00303103	no
rs12767100:C	10	104338014	A	C	0.491436	0.995129	0.75 (0.59-0.95)	0.0171702	0.517466	0.981519	0.76 (0.56-1.03)	0.0737147	0.75 (0.63-0.91)	0.0030421	no
rs61874852:A	10	104012285	G	A	0.0940123	0.932194	0.62 (0.41-0.94)	0.0207135	0.157261	0.959086	0.66 (0.43-1.01)	0.0562326	0.64 (0.47-0.86)	0.00309065	no
rs41287457:G	10	104161724	A	G	0.124835	0.950529	0.55 (0.38-0.8)	0.00137487	0.153593	0.932067	0.82 (0.53-1.27)	0.377184	0.65 (0.49-0.87)	0.00317288	no
rs71724286:C	10	104436019	CT	C	0.170577	0.786982	0.82 (0.57-1.18)	0.293306	0.211456	0.794697	0.48 (0.31-0.74)	0.00066823	0.66 (0.5-0.87)	0.00323541	no
rs3934960:G	10	104355275	A	G	0.490583	0.995103	0.75 (0.6-0.96)	0.0188167	0.516121	0.986085	0.76 (0.56-1.03)	0.0731053	0.76 (0.63-0.91)	0.00328803	no
rs61874856:G	10	104038766	A	G	0.0921199	0.939268	0.62 (0.41-0.93)	0.0196934	0.15661	0.96229	0.67 (0.43-1.03)	0.0657493	0.64 (0.47-0.86)	0.00345036	no
rs11394977:TA	10	104226408	T	TA	0.181409	0.898444	1.33 (0.98-1.81)	0.0694293	0.239795	0.910413	1.6 (1.09-2.35)	0.0145492	1.43 (1.12-1.81)	0.00362752	no
rs61874855:A	10	104037333	G	A	0.0918495	0.941338	0.62 (0.41-0.94)	0.0211289	0.156591	0.96242	0.67 (0.43-1.03)	0.0654728	0.64 (0.48-0.87)	0.0036436	no
rs36008569:T	10	104365489	TG	T	0.489801	0.995096	0.76 (0.6-0.96)	0.0210938	0.516085	0.986119	0.76 (0.56-1.03)	0.0731563	0.76 (0.63-0.91)	0.00366113	no
rs12782153:G	10	104368294	A	G	0.489801	0.995096	0.76 (0.6-0.96)	0.0210938	0.516086	0.986115	0.76 (0.56-1.03)	0.0731674	0.76 (0.63-0.91)	0.00366156	no
rs55659266:C	10	104189578	CT	C	0.900972	0.866924	0.48 (0.31-0.73)	0.000437222	0.891516	0.85876	0.89 (0.54-1.48)	0.656235	0.62 (0.45-0.86)	0.00381259	no
rs3758547:T	10	104261963	C	T	0.102369	0.897334	0.67 (0.45-1.02)	0.056075	0.128001	0.870228	0.42 (0.21-0.84)	0.0114298	0.6 (0.42-0.85)	0.00390723	no
rs201428036:CT	10	104246547	C	CT	0.198626	0.879153	1.33 (0.98-1.81)	0.0644037	0.265595	0.874516	1.57 (1.07-2.31)	0.0180567	1.42 (1.12-1.81)	0.00391121	no
rs11598884:G	10	104234588	A	G	0.0817038	0.915689	0.49 (0.31-0.78)	0.00175047	0.107242	0.938314	0.78 (0.44-1.38)	0.390782	0.59 (0.41-0.85)	0.0040743	no
rs56940532:C	10	104206808	T	C	0.134512	0.895133	0.61 (0.42-0.88)	0.00654151	0.131711	0.848399	0.74 (0.45-1.21)	0.227918	0.65 (0.48-0.87)	0.00419069	no
rs140590274:ATG	10	104371974	A	ATG	0.428963	0.945988	1.28 (0.99-1.64)	0.0541318	0.424223	0.952014	1.42 (1.04-1.94)	0.0271491	1.33 (1.09-1.62)	0.00421112	no
rs12779854:A	10	104358474	G	A	0.488891	0.994896	0.76 (0.6-0.97)	0.0255527	0.516961	0.985675	0.76 (0.56-1.03)	0.0714747	0.76 (0.63-0.92)	0.00429814	no
rs11191342:A	10	104344450	G	A	0.175987	0.932151	1.33 (0.98-1.81)	0.0678812	0.233913	0.935109	1.57 (1.07-2.3)	0.0195064	1.42 (1.12-1.8)	0.00431933	no
rs11598186:A	10	104246318	G	A	0.083299	0.927258	0.5 (0.32-0.79)	0.00203133	0.107039	0.943116	0.78 (0.44-1.38)	0.398111	0.6 (0.42-0.85)	0.00443154	no
rs61874853:T	10	104015737	C	T	0.0909762	0.941708	0.63 (0.42-0.96)	0.0273909	0.156496	0.963368	0.67 (0.43-1.02)	0.0639931	0.65 (0.48-0.87)	0.00443261	no
rs17709610:G	10	104250278	A	G	0.083299	0.927258	0.5 (0.32-0.79)	0.00203133	0.10704	0.943125	0.78 (0.44-1.38)	0.398184	0.6 (0.42-0.85)	0.00443276	no
rs55920875:C	10	104251242	T	C	0.083299	0.927258	0.5 (0.32-0.79)	0.00203133	0.107041	0.943135	0.78 (0.44-1.38)	0.398184	0.6 (0.42-0.85)	0.00443276	no
rs12767131:C	10	104268626	T	C	0.0833139	0.927137	0.5 (0.32-0.79)	0.00204566	0.107053	0.943106	0.78 (0.44-1.38)	0.398729	0.6 (0.42-0.85)	0.00446268	no
rs2296580:T	10	104241683	G	T	0.0833122	0.927114	0.5 (0.32-0.79)	0.00204529	0.106101	0.94279	0.78 (0.44-1.38)	0.398838	0.6 (0.42-0.85)	0.00446329	no
rs61873704:C	10	104236929	T	C	0.179853	0.912769	1.31 (0.96-1.78)	0.0843191	0.237706	0.909036	1.61 (1.09-2.36)	0.0141828	1.42 (1.11-1.8)	0.00448002	no
JHU_10.104328718	10	104328719	A	C	0.486928	1	0.77 (0.61-0.98)	0.0303954	0.522987	0.996157	0.76 (0.57-1.02)	0.0650055	0.77 (0.64-0.92)	0.0046579	no
rs746552:G	10	104342501	A	G	0.176133	0.927897	1.32 (0.97-1.8)	0.0793011	0.23458	0.92776	1.57 (1.07-2.31)	0.0190885	1.41 (1.11-1.8)	0.00501638	no
rs12784963:A	10	104336986	G	A	0.490609	0.986542	0.75 (0.59-0.95)	0.0154984	0.510335	0.969245	0.8 (0.59-1.08)	0.140176	0.77 (0.64-0.92)	0.00509837	no
rs78549129:T	10	104376946	C	T	0.0435737	0.825275	0.71 (0.37-1.35)	0.295505	0.116245	0.871283	0.28 (0.13-0.62)	0.000832823	0.49 (0.3-0.81)	0.00537454	no
rs7072014:T	10	104420078	C	T	0.156836	0.900192	1.36 (0.98-1.88)	0.0661161	0.194034	0.912595	1.57 (1.04-2.35)	0.0277897	1.43 (1.11-1.85)	0.00547545	no
rs116239977:T	10	104272710	A	T	0.0413271	0.80405	0.73 (0.38-1.42)	0.352463	0.10883	0.869351	0.25 (0.11-0.58)	0.0004329	0.48 (0.29-0.81)	0.00563739	no
rs61873665:A	10	104189852	G	A	0.137242	0.923435	0.61 (0.43-0.87)	0.00607599	0.130117	0.898945	0.78 (0.48-1.27)	0.319302	0.67 (0.5-0.89)	0.00567538	no
rs72353827:A	10	104300474	AAT	A	0.406892	0.901913	1.35 (1.05-1.74)	0.0187288	0.415629	0.887904	1.28 (0.93-1.76)	0.130982	1.32 (1.08-1.61)	0.00570341	no
rs7923674:T	10	104235808	G	T	0.210852	0.870807	1.21 (0.9-1.63)	0.199292	0.270048	0.856434	1.77 (1.2-2.61)	0.00312444	1.39 (1.1-1.76)	0.00573304	no
rs7894593:A	10	104194081	G	A	0.137205	0.920369	0.61 (0.43-0.88)	0.00626705	0.129985	0.895467	0.78 (0.48-1.27)	0.317546	0.67 (0.5-0.89)	0.00577748	no
rs11574849:A	10	104159696	G	A	0.124697	0.950629	0.56 (0.38-0.81)	0.00170187	0.148035	0.93959	0.87 (0.56-1.35)	0.528808	0.67 (0.5-0.89)	0.00578595	no
rs11191347:A	10	104351617	G	A	0.177376	0.932062	1.3 (0.96-1.77)	0.0930215	0.235697	0.929187	1.57 (1.07-2.3)	0.0192324	1.4 (1.1-1.78)	0.00608702	no
rs10883726:T	10	104236276	C	T	0.178667	0.917393	1.31 (0.96-1.77)	0.0886841	0.234057	0.91149	1.56 (1.06-2.29)	0.0209826	1.4 (1.1-1.78)	0.00614852	no
rs1056739:C	10	104236542	T	C	0.178667	0.917409	1.31 (0.96-1.77)	0.0887045	0.234914	0.912242	1.56 (1.06-2.29)	0.0209815	1.4 (1.1-1.78)	0.00614983	no
rs1056740:T	10	104236552	C	T	0.177582	0.911712	1.3 (0.96-1.77)	0.0924719	0.235877	0.912491	1.56 (1.06-2.29)	0.0209819	1.4 (1.1-1.78)	0.00641115	no
rs5787464:CT	10	104298106	C	CT	0.373284	0.93247	1.34 (1.04-1.73)	0.0207723	0.378851	0.929166	1.27 (0.92-1.75)	0.136747	1.32 (1.08-1.6)	0.00646622	no
rs10748827:T	10	104368336	G	T	0.178441	0.932815	1.29 (0.95-1.76)	0.0989017	0.235708	0.929387	1.57 (1.07-2.3)	0.0192626	1.39 (1.1-1.77)	0.00654963	no
rs138807813:GT	10	104063747	G	GT	0.0954886	0.91846	0.65 (0.43-0.98)	0.0349631	0.161535	0.945287	0.68 (0.45-1.04)	0.0771869	0.66 (0.49-0.89)	0.00655878	no
rs7068535:T	10	104349127	C	T	0.178465	0.932672	1.29 (0.95-1.76)	0.0993062	0.23574	0.929199	1.57 (1.07-2.3)	0.0192527	1.39 (1.1-1.77)	0.00657979	no
rs2296582:T	10	104244139	G	T	0.178059	0.925929	1.3 (0.96-1.77)	0.0921189	0.234827	0.918524	1.55 (1.06-2.27)	0.0221231	1.39 (1.1-1.77)	0.00658337	no
rs2296581:A	10	104242886	G	A	0.178059	0.925929	1.3 (0.96-1.77)	0.0921189	0.23385	0.918362	1.55 (1.06-2.27)	0.0221239	1.39 (1.1-1.77)	0.0065835	no
rs7079810:T	10	104243883	C	T	0.178059	0.925929	1.3 (0.96-1.77)	0.0921189	0.234826	0.918529	1.55 (1.06-2.27)	0.0221239	1.39 (1.1-1.77)	0.0065835	no
rs3215819:GA	10	104241138	G	GA	0.178059	0.925923	1.3 (0.96-1.77)	0.0921296	0.234819	0.918554	1.55 (1.06-2.27)	0.022128	1.39 (1.1-1.77)	0.00658513	no
rs1056857:T	10	104240003	C	T	0.178059	0.925902	1.3 (0.96-1.77)	0.0921772	0.234815	0.918535	1.55 (1.06-2.27)	0.0221082	1.39 (1.1-1.77)	0.00658542	no
rs61873660:T	10	104138996	C	T	0.0920489	0.944941	0.67 (0.44-1)	0.0484937	0.155337	0.951997	0.66 (0.43-1.02)	0.057865	0.66 (0.49-0.89)	0.00662715	no
rs1056741:C	10	104236640	A	C	0.176194	0.909422	1.32 (0.97-1.81)	0.0749261	0.226796	0.893523	1.53 (1.03-2.26)	0.0304271	1.4 (1.1-1.78)	0.00668137	no
rs59426691:C	10	104238461	G	C	0.178415	0.922726	1.3 (0.96-1.77)	0.0926378	0.234271	0.915052	1.55 (1.06-2.27)	0.0227016	1.39 (1.1-1.77)	0.0067558	no
rs72845807:A	10	104385132	G	A	0.155661	0.913966	0.57 (0.4-0.8)	0.00109724	0.134445	0.923835	0.97 (0.58-1.63)	0.916291	0.67 (0.5-0.9)	0.00694815	no
rs10786677:T	10	104313365	C	T	0.186092	0.929405	1.31 (0.97-1.77)	0.080435	0.239479	0.928129	1.51 (1.03-2.2)	0.0298277	1.38 (1.09-1.75)	0.00699851	no
rs7899576:A	10	104307504	G	A	0.186285	0.929777	1.31 (0.97-1.77)	0.0810187	0.241228	0.933094	1.5 (1.03-2.19)	0.0309287	1.38 (1.09-1.75)	0.00722061	no
rs10883763:A	10	104427825	C	A	0.0969382	0.85882	1.73 (1.14-2.64)	0.00938738	0.143655	0.888109	1.32 (0.83-2.09)	0.237317	1.53 (1.12-2.09)	0.00726865	no
rs10883725:C	10	104235956	G	C	0.179847	0.914738	1.29 (0.95-1.75)	0.102673	0.234203	0.911073	1.56 (1.06-2.29)	0.0210729	1.39 (1.09-1.77)	0.00727145	no
rs111503247:GC	10	104234781	G	GC	0.179849	0.914707	1.29 (0.95-1.75)	0.102668	0.234495	0.910631	1.56 (1.06-2.29)	0.0210882	1.39 (1.09-1.77)	0.00727486	no
rs7358269:A	10	104247538	G	A	0.188399	0.924375	1.28 (0.95-1.74)	0.106301	0.246219	0.922853	1.54 (1.06-2.24)	0.0205985	1.38 (1.09-1.75)	0.00732391	no
rs2296585:T	10	104245549	C	T	0.188398	0.924372	1.28 (0.95-1.74)	0.106304	0.246208	0.9228	1.54 (1.06-2.24)	0.0205985	1.38 (1.09-1.75)	0.00732413	no
rs4285804:A	10	104386309	T	A	0.495141	0.963798	0.76 (0.6-0.97)	0.0237644	0.525468	0.955316	0.79 (0.58-1.08)	0.138132	0.77 (0.64-0.93)	0.00732575	no
rs715438:T	10	104258303	C	T	0.188296	0.924922	1.28 (0.95-1.74)	0.107475	0.246218	0.923284	1.54 (1.06-2.24)	0.0204222	1.38 (1.09-1.75)	0.00737387	no
rs7898716:A	10	104255098	G	A	0.188306	0.924885	1.28 (0.95-1.73)	0.107632	0.246202	0.923194	1.54 (1.06-2.24)	0.020419	1.38 (1.09-1.75)	0.00738581	no
rs59430798:G	10	104382580	GA	G	0.337001	0.704767	1.4 (1.03-1.9)	0.0300091	0.344197	0.704892	1.39 (0.93-2.09)	0.105959	1.4 (1.09-1.78)	0.00741789	no
rs10786679:A	10	104315667	G	A	0.169093	0.926252	1.31 (0.96-1.79)	0.0917995	0.216784	0.918491	1.54 (1.04-2.28)	0.0263867	1.4 (1.09-1.78)	0.00742511	no
rs11191301:T	10	104247681	C	T	0.188132	0.924024	1.28 (0.94-1.73)	0.112514	0.246213	0.922854	1.54 (1.06-2.24)	0.0206078	1.38 (1.09-1.74)	0.00779931	no
rs145882868:TTTCA	10	104426236	T	TTTCA	0.0990948	0.859628	1.67 (1.1-2.54)	0.0141456	0.145947	0.891311	1.35 (0.85-2.14)	0.196796	1.52 (1.12-2.07)	0.00789487	no
rs12570201:C	10	104222963	T	C	0.473149	0.952048	0.74 (0.58-0.94)	0.0136326	0.473537	0.925014	0.83 (0.6-1.14)	0.243784	0.77 (0.63-0.93)	0.00789489	no
rs7078435:C	10	104304766	T	C	0.186332	0.927978	1.31 (0.97-1.77)	0.081492	0.241013	0.927629	1.49 (1.02-2.17)	0.0349349	1.38 (1.09-1.74)	0.0079293	no
rs7072351:T	10	104265047	C	T	0.186371	0.923997	1.3 (0.96-1.76)	0.0897551	0.24164	0.928496	1.49 (1.02-2.18)	0.0339589	1.37 (1.08-1.74)	0.00862257	no
rs3837369:A	10	104442056	ACT	A	0.131249	0.83925	0.83 (0.57-1.21)	0.33671	0.158006	0.898291	0.51 (0.33-0.8)	0.00293031	0.68 (0.51-0.91)	0.00866792	no
rs3832710:A	10	104445545	AG	A	0.131286	0.838957	0.83 (0.57-1.21)	0.337848	0.158046	0.898064	0.51 (0.33-0.8)	0.00293212	0.68 (0.51-0.91)	0.00871404	no
rs78322845:G	10	104337439	GT	G	0.465748	0.934969	1.24 (0.96-1.58)	0.0939716	0.446973	0.891239	1.42 (1.03-1.95)	0.0313773	1.3 (1.07-1.58)	0.00872322	no
rs11191321:T	10	104293412	C	T	0.186432	0.92574	1.31 (0.97-1.77)	0.0817089	0.240748	0.931631	1.47 (1.01-2.14)	0.0412751	1.37 (1.08-1.73)	0.00894527	no
rs1536308:G	10	104288777	T	G	0.186432	0.925743	1.31 (0.97-1.77)	0.081707	0.240722	0.931775	1.47 (1.01-2.14)	0.0412809	1.37 (1.08-1.73)	0.00894604	no
rs11191320:C	10	104293394	T	C	0.186444	0.925718	1.31 (0.97-1.77)	0.0818638	0.240753	0.931625	1.47 (1.01-2.14)	0.0412365	1.37 (1.08-1.73)	0.00895749	no
rs7896841:T	10	104294665	C	T	0.186444	0.925719	1.31 (0.97-1.77)	0.0818512	0.240753	0.931622	1.47 (1.01-2.14)	0.0412518	1.37 (1.08-1.73)	0.00895873	no
rs7897368:G	10	104295155	A	G	0.186444	0.925719	1.31 (0.97-1.77)	0.0818512	0.240753	0.931622	1.47 (1.01-2.14)	0.0412518	1.37 (1.08-1.73)	0.00895873	no
rs11191325:A	10	104302933	G	A	0.186406	0.925919	1.31 (0.97-1.77)	0.0821999	0.240748	0.931588	1.47 (1.01-2.14)	0.0412553	1.37 (1.08-1.73)	0.00899946	no
rs56219824:T	10	104302337	C	T	0.186406	0.925919	1.31 (0.97-1.77)	0.0821999	0.240747	0.931604	1.47 (1.01-2.14)	0.0412616	1.37 (1.08-1.73)	0.00900058	no
rs6584510:G	10	104299868	T	G	0.186407	0.925916	1.31 (0.97-1.77)	0.0821844	0.240748	0.931608	1.47 (1.01-2.14)	0.0412741	1.37 (1.08-1.73)	0.00900085	no
rs9988738:T	10	104296213	C	T	0.186406	0.92592	1.31 (0.97-1.77)	0.0821978	0.240747	0.931623	1.47 (1.01-2.14)	0.0412781	1.37 (1.08-1.73)	0.00900282	no
rs35914362:C	10	104351255	CA	C	0.459055	0.926174	1.27 (0.99-1.62)	0.0601858	0.431161	0.919622	1.35 (0.98-1.86)	0.0634183	1.3 (1.07-1.58)	0.0090969	no
rs1409311:A	10	104282160	G	A	0.186657	0.924458	1.31 (0.96-1.77)	0.0842347	0.241382	0.929243	1.47 (1.01-2.14)	0.041054	1.37 (1.08-1.73)	0.00922029	no
rs913025:T	10	104276043	C	T	0.186658	0.924457	1.31 (0.96-1.77)	0.0842482	0.241381	0.929279	1.47 (1.01-2.14)	0.0410805	1.37 (1.08-1.73)	0.00922583	no
rs10883733:A	10	104302203	T	A	0.649017	0.787391	0.67 (0.51-0.88)	0.00357145	0.538465	0.74323	0.91 (0.63-1.33)	0.63195	0.74 (0.6-0.93)	0.00926808	no
rs10883729:G	10	104273943	A	G	0.187078	0.922787	1.3 (0.96-1.76)	0.090983	0.241383	0.929268	1.47 (1.01-2.14)	0.0410649	1.36 (1.08-1.73)	0.0100083	no
rs11596235:T	10	104391034	C	T	0.151634	0.906377	0.57 (0.4-0.82)	0.0015707	0.136684	0.913707	0.99 (0.59-1.66)	0.96686	0.68 (0.51-0.91)	0.010021	no
rs10883765:C	10	104456686	T	C	0.0777761	0.849962	0.73 (0.46-1.16)	0.180238	0.10991	0.92873	0.54 (0.33-0.9)	0.0178921	0.64 (0.45-0.9)	0.0103882	no
rs144348698:GAT	10	104287255	G	GAT	0.360238	0.894836	1.21 (0.93-1.57)	0.15103	0.286168	0.855803	1.56 (1.08-2.24)	0.0145613	1.32 (1.07-1.63)	0.0104763	no
rs112625444:GT	10	104301896	G	GT	0.202806	0.901224	1.27 (0.94-1.71)	0.123253	0.238485	0.893898	1.54 (1.05-2.28)	0.0254447	1.36 (1.08-1.73)	0.0105549	no
rs4526717:A	10	104316327	G	A	0.173016	0.928979	1.27 (0.93-1.73)	0.136011	0.231616	0.925511	1.54 (1.05-2.26)	0.0243967	1.37 (1.08-1.74)	0.0108203	no
rs61629496:C	10	104448256	CT	C	0.888254	0.638409	0.56 (0.35-0.89)	0.0134044	0.871338	0.572409	0.73 (0.38-1.39)	0.330411	0.62 (0.42-0.9)	0.0111109	no
rs10219057:C	10	104280238	A	C	0.18827	0.925046	1.28 (0.95-1.74)	0.106251	0.243419	0.92245	1.48 (1.01-2.16)	0.0387351	1.36 (1.07-1.72)	0.011374	no
rs11191335:C	10	104317236	G	C	0.172748	0.928587	1.26 (0.92-1.72)	0.143866	0.231556	0.925212	1.54 (1.05-2.26)	0.0244108	1.37 (1.07-1.74)	0.0115228	no
rs67420311:G	10	104471091	GTGTA	G	0.755782	0.817192	1.4 (1.03-1.91)	0.0316694	0.803181	0.789243	1.33 (0.89-2)	0.168062	1.37 (1.07-1.76)	0.0115606	no
rs56397707:C	10	104302693	T	C	0.18804	0.926372	1.28 (0.95-1.74)	0.104289	0.242642	0.925272	1.47 (1.01-2.14)	0.042129	1.35 (1.07-1.71)	0.0118021	no
rs1326193:T	10	104271674	G	T	0.188292	0.924919	1.28 (0.95-1.74)	0.106762	0.243111	0.923728	1.47 (1.01-2.15)	0.0406991	1.35 (1.07-1.71)	0.0118285	no
rs7899004:C	10	104341435	T	C	0.442535	0.965104	1.29 (1.01-1.65)	0.0376885	0.398484	0.941248	1.26 (0.91-1.74)	0.154556	1.28 (1.06-1.56)	0.0122357	no
rs11191293:G	10	104221539	A	G	0.202475	0.860983	0.69 (0.51-0.94)	0.0153201	0.239148	0.830734	0.81 (0.53-1.24)	0.335128	0.73 (0.57-0.93)	0.0123899	no
rs1056738:A	10	104236481	G	A	0.173619	0.913152	1.26 (0.92-1.72)	0.149122	0.229281	0.909436	1.53 (1.04-2.25)	0.0260679	1.36 (1.07-1.74)	0.0125424	no
rs12572855:T	10	104374246	C	T	0.041501	0.825679	0.8 (0.42-1.53)	0.499994	0.114799	0.873622	0.29 (0.13-0.64)	0.00120593	0.53 (0.32-0.88)	0.0139879	no
rs6584505:A	10	104254412	C	A	0.183264	0.920833	1.24 (0.91-1.68)	0.176388	0.241458	0.920931	1.52 (1.05-2.21)	0.025262	1.34 (1.06-1.71)	0.0147069	no
rs12414407:C	10	104387019	T	C	0.78621	0.910184	0.74 (0.55-0.99)	0.0441596	0.749632	0.905365	0.77 (0.54-1.11)	0.162103	0.75 (0.6-0.95)	0.0150065	no
rs3977758:C	10	104131751	G	C	0.561534	0.978781	0.82 (0.65-1.04)	0.108432	0.582987	0.968336	0.74 (0.54-1.01)	0.0595729	0.79 (0.66-0.96)	0.0161569	no
rs1409313:C	10	104191601	T	C	0.918409	0.834036	0.37 (0.22-0.61)	4.14023e-05	0.951262	0.832362	1.87 (0.86-4.03)	0.106986	0.6 (0.39-0.91)	0.0162755	no
rs4323806:G	10	104422012	A	G	0.905943	0.915835	1.2 (0.78-1.84)	0.40258	0.876573	0.886596	1.88 (1.18-3.01)	0.00722001	1.47 (1.07-2.02)	0.0166366	no
rs3802680:T	10	104114886	C	T	0.560793	0.981766	0.82 (0.65-1.04)	0.108265	0.581985	0.970969	0.74 (0.54-1.02)	0.062194	0.79 (0.66-0.96)	0.0166519	no
rs71016385:CA	10	104235055	C	CA	0.467803	0.905228	0.73 (0.57-0.94)	0.0144127	0.501374	0.867324	0.88 (0.64-1.21)	0.431022	0.79 (0.65-0.96)	0.0167738	no
rs377690935:A	10	104331989	AT	A	0.513663	0.916414	1.22 (0.95-1.56)	0.124015	0.479188	0.900717	1.36 (0.99-1.86)	0.0564319	1.27 (1.04-1.54)	0.017535	no
rs7096072:T	10	104299976	C	T	0.181378	0.921803	1.26 (0.93-1.72)	0.138147	0.236008	0.929427	1.45 (0.99-2.1)	0.0503547	1.33 (1.05-1.69)	0.017816	no
rs1409312:T	10	104191800	C	T	0.917068	0.838513	0.39 (0.24-0.63)	7.16224e-05	0.951096	0.829574	1.85 (0.86-3.98)	0.113038	0.61 (0.4-0.92)	0.0180141	no
rs17782574:A	10	104279394	G	A	0.181627	0.920321	1.26 (0.93-1.72)	0.141296	0.236649	0.927015	1.45 (0.99-2.11)	0.0500801	1.33 (1.05-1.69)	0.0182206	no
rs7923675:T	10	104235809	G	T	0.249001	0.901757	1.15 (0.88-1.51)	0.316095	0.297488	0.865104	1.65 (1.13-2.39)	0.00721672	1.3 (1.05-1.62)	0.0185903	no
rs7342070:C	10	104223628	T	C	0.541927	0.948976	0.72 (0.56-0.91)	0.00643651	0.544609	0.923781	0.95 (0.69-1.31)	0.759532	0.79 (0.65-0.96)	0.0187516	no
rs11593061:G	10	104398288	A	G	0.0995002	0.871313	0.54 (0.35-0.84)	0.00457491	0.120726	0.903081	0.92 (0.54-1.56)	0.748385	0.67 (0.48-0.94)	0.0197831	no
rs927821:A	10	104207799	C	A	0.916292	0.82103	0.39 (0.24-0.63)	8.3673e-05	0.950245	0.804878	1.95 (0.88-4.32)	0.0937981	0.61 (0.4-0.92)	0.0198665	no
rs113374192:CA	10	104338463	C	CA	0.415208	0.862489	1.16 (0.9-1.5)	0.260855	0.391856	0.863682	1.52 (1.08-2.15)	0.0156421	1.28 (1.04-1.57)	0.0202803	no
rs2863708:A	10	104204290	C	A	0.916404	0.83219	0.39 (0.24-0.64)	8.62656e-05	0.950439	0.805711	1.93 (0.88-4.25)	0.093882	0.61 (0.4-0.93)	0.0203193	no
rs2863710:A	10	104204566	C	A	0.860517	0.811814	0.55 (0.38-0.8)	0.00119914	0.91174	0.762906	1.27 (0.69-2.31)	0.441078	0.69 (0.5-0.95)	0.0208673	no
rs11191294:G	10	104225837	T	G	0.117293	0.833422	1.44 (0.98-2.13)	0.064391	0.193686	0.853615	1.36 (0.88-2.09)	0.16229	1.4 (1.05-1.87)	0.0219097	no
rs10883723:C	10	104225832	T	C	0.117311	0.833555	1.44 (0.98-2.13)	0.0646361	0.193691	0.853634	1.35 (0.88-2.09)	0.162435	1.4 (1.05-1.87)	0.0219985	no
rs3961455:A	10	104421471	G	A	0.0952988	0.879181	0.59 (0.38-0.9)	0.0130997	0.113292	0.904434	0.84 (0.49-1.45)	0.530924	0.67 (0.48-0.95)	0.0222307	no
rs80157931:G	10	104301732	C	G	0.183011	0.922301	1.24 (0.91-1.69)	0.171554	0.23774	0.92379	1.45 (0.99-2.11)	0.049954	1.32 (1.04-1.67)	0.022506	no
rs375915173:G	10	104045951	GT	G	0.661531	0.771196	0.81 (0.61-1.06)	0.117288	0.635368	0.777501	0.72 (0.5-1.05)	0.0865014	0.78 (0.62-0.97)	0.0238148	no
rs202018807:G	10	104045961	T	G	0.661531	0.771196	0.81 (0.61-1.06)	0.117288	0.635368	0.777501	0.72 (0.5-1.05)	0.0865014	0.78 (0.62-0.97)	0.0238148	no
rs35430312:C	10	104037149	CT	C	0.195543	0.795916	0.79 (0.57-1.09)	0.147216	0.275961	0.800925	0.68 (0.45-1.03)	0.0669305	0.75 (0.58-0.96)	0.0241904	no
rs7086205:T	10	104202729	C	T	0.919789	0.841175	0.39 (0.24-0.64)	9.33065e-05	0.952366	0.828759	1.98 (0.9-4.34)	0.0825171	0.62 (0.41-0.94)	0.0242523	no
rs4919637:G	10	104208761	C	G	0.913205	0.794465	0.41 (0.25-0.67)	0.000191241	0.950656	0.744184	1.94 (0.86-4.4)	0.102995	0.62 (0.4-0.94)	0.0248809	no
rs7093285:C	10	104374815	G	C	0.110262	0.883334	1.45 (0.98-2.14)	0.0598063	0.179882	0.903168	1.31 (0.86-2.01)	0.201372	1.39 (1.04-1.85)	0.0253162	no
rs71912020:TA	10	104327966	T	TA	0.192842	0.862628	1.26 (0.93-1.71)	0.141505	0.241319	0.864794	1.42 (0.96-2.1)	0.0758691	1.32 (1.03-1.68)	0.0253931	no
rs114077816:A	10	104275065	G	A	0.0803685	0.962062	0.55 (0.35-0.86)	0.00729637	0.0510164	0.932146	1.1 (0.45-2.64)	0.838197	0.64 (0.43-0.95)	0.0254002	no
rs61362296:A	10	104246709	AT	A	0.513749	0.949966	0.71 (0.56-0.91)	0.00594757	0.501175	0.93019	0.98 (0.72-1.32)	0.871078	0.8 (0.66-0.97)	0.0254584	no
rs74317069:G	10	104165562	A	G	0.120614	0.942082	1.34 (0.93-1.92)	0.112244	0.0811528	0.928541	1.7 (0.93-3.14)	0.0757315	1.42 (1.04-1.94)	0.0254749	no
10:104048862:G	10	104048862	GA	G	0.284107	0.667173	1.43 (1.06-1.94)	0.0193525	0.313342	0.618049	1.13 (0.73-1.75)	0.576814	1.33 (1.03-1.7)	0.0261962	no
rs73336667:C	10	104271385	G	C	0.17167	0.939266	1.34 (0.97-1.83)	0.0717517	0.115171	0.915659	1.41 (0.85-2.36)	0.179265	1.36 (1.04-1.77)	0.0263474	no
rs11591681:T	10	104313377	C	T	0.0666856	0.86921	0.54 (0.32-0.93)	0.0212392	0.080221	0.911476	0.78 (0.42-1.47)	0.443971	0.63 (0.42-0.95)	0.0270499	no
rs138477583:T	10	104374301	C	T	0.0811136	0.962722	0.56 (0.36-0.87)	0.00828587	0.0525733	0.931437	1.07 (0.46-2.48)	0.879435	0.64 (0.43-0.95)	0.0275366	no
rs145582570:AT	10	104074075	A	AT	0.121051	0.947789	1.32 (0.93-1.89)	0.121655	0.0780107	0.921021	1.72 (0.93-3.18)	0.0736477	1.41 (1.04-1.92)	0.0277258	no
rs116770240:T	10	104371691	C	T	0.0810565	0.963034	0.56 (0.36-0.87)	0.00813365	0.0506378	0.903288	1.14 (0.46-2.85)	0.776609	0.64 (0.43-0.95)	0.0281908	no
rs73338656:G	10	104331457	A	G	0.171272	0.935526	1.35 (0.98-1.85)	0.0639438	0.112753	0.909551	1.36 (0.81-2.28)	0.239437	1.35 (1.03-1.77)	0.0292381	no
rs61691222:T	10	104420754	C	T	0.0869695	0.870548	0.59 (0.37-0.92)	0.0179034	0.112567	0.907024	0.84 (0.49-1.45)	0.534725	0.68 (0.48-0.96)	0.0293715	no
rs139208244:C	10	104114235	CCT	C	0.120785	0.949495	1.31 (0.92-1.88)	0.136213	0.0815713	0.925951	1.74 (0.94-3.21)	0.0655391	1.41 (1.03-1.92)	0.0294187	no
rs73342664:A	10	104412509	G	A	0.194679	0.939347	1.27 (0.95-1.71)	0.111418	0.117037	0.897186	1.54 (0.91-2.62)	0.0990884	1.33 (1.03-1.72)	0.029746	no
rs139198315:G	10	104148189	A	G	0.120621	0.945831	1.33 (0.93-1.9)	0.118214	0.0802554	0.916855	1.69 (0.9-3.15)	0.0884577	1.41 (1.03-1.93)	0.0298115	no
rs73344427:T	10	104467493	C	T	0.0699442	0.874396	2.23 (1.35-3.66)	0.0010326	0.0968231	0.888736	0.93 (0.53-1.61)	0.783537	1.51 (1.04-2.19)	0.0299004	no
rs57147804:G	10	104470737	A	G	0.069922	0.874411	2.23 (1.36-3.67)	0.00103277	0.0967421	0.888461	0.92 (0.53-1.61)	0.782669	1.51 (1.04-2.19)	0.0299763	no
10:104061466:A	10	104061466	C	A	0.0433301	0.865734	0.57 (0.3-1.1)	0.0841663	0.0542987	0.813608	0.6 (0.29-1.26)	0.177441	0.58 (0.36-0.95)	0.0313232	no
rs73342660:C	10	104411836	G	C	0.193735	0.943375	1.27 (0.94-1.7)	0.11682	0.116842	0.89849	1.54 (0.91-2.61)	0.100275	1.33 (1.03-1.72)	0.0315132	no
rs113667395:T	10	104276072	C	T	0.174177	0.925079	1.35 (0.98-1.85)	0.0635475	0.116921	0.909141	1.33 (0.8-2.2)	0.267681	1.34 (1.03-1.76)	0.0317483	no
rs73338660:A	10	104333464	G	A	0.17148	0.933879	1.32 (0.96-1.82)	0.0814429	0.11326	0.911111	1.38 (0.82-2.3)	0.217119	1.34 (1.02-1.75)	0.034287	no
rs11333978:A	10	104257409	AT	A	0.204424	0.893404	1.16 (0.85-1.56)	0.348126	0.252734	0.902742	1.53 (1.05-2.23)	0.0245441	1.29 (1.02-1.63)	0.0349642	no
rs3961457:A	10	104429639	G	A	0.592905	0.921939	0.92 (0.72-1.16)	0.475692	0.647627	0.917262	0.63 (0.45-0.89)	0.00725628	0.81 (0.67-0.99)	0.0360233	no
rs35959091:TA	10	104400594	T	TA	0.0957913	0.876077	0.59 (0.38-0.91)	0.0137807	0.113577	0.912662	0.91 (0.53-1.55)	0.723149	0.7 (0.5-0.98)	0.0363053	no
rs12240453:A	10	104218850	C	A	0.186898	0.843423	1.18 (0.86-1.61)	0.307056	0.209129	0.842761	1.58 (1.04-2.41)	0.0284163	1.31 (1.02-1.68)	0.0364102	no
rs884825:G	10	104427616	T	G	0.582558	0.924317	0.92 (0.72-1.16)	0.475117	0.64216	0.917433	0.64 (0.45-0.89)	0.00794061	0.81 (0.67-0.99)	0.0372072	no
rs2281878:A	10	104210735	C	A	0.245004	0.808646	0.72 (0.54-0.97)	0.0302661	0.256902	0.796091	0.89 (0.58-1.36)	0.58317	0.77 (0.61-0.99)	0.037872	no
rs10561396:T	10	104064932	TTGTG	T	0.531669	0.867813	0.84 (0.66-1.07)	0.157876	0.56081	0.854267	0.75 (0.53-1.07)	0.107752	0.81 (0.66-0.99)	0.0383019	no
rs41287460:A	10	104164488	G	A	0.135621	0.949917	0.64 (0.44-0.91)	0.0117641	0.181942	0.942857	0.94 (0.63-1.41)	0.775235	0.76 (0.58-0.99)	0.0402458	no
rs148337160:C	10	104166504	T	C	0.0872232	0.836427	1.7 (1.08-2.69)	0.0206522	0.0697021	0.805729	1.12 (0.62-2.03)	0.701949	1.46 (1.02-2.09)	0.0409267	no
rs113679562:A	10	104370128	C	A	0.17297	0.933451	1.3 (0.95-1.78)	0.10609	0.113749	0.90869	1.39 (0.83-2.34)	0.199087	1.32 (1.01-1.73)	0.0418417	no
rs73340608:A	10	104372865	G	A	0.17297	0.933451	1.3 (0.95-1.78)	0.10609	0.113749	0.90869	1.39 (0.83-2.34)	0.199087	1.32 (1.01-1.73)	0.0418417	no
rs7904955:T	10	104367092	C	T	0.111749	0.886321	1.39 (0.95-2.05)	0.0908603	0.182357	0.905044	1.28 (0.84-1.96)	0.24398	1.34 (1.01-1.79)	0.0428603	no
rs12771867:A	10	104246691	G	A	0.487269	0.973149	0.77 (0.61-0.98)	0.0295615	0.468227	0.955611	0.92 (0.68-1.26)	0.616655	0.82 (0.68-0.99)	0.0435701	no
rs73338627:A	10	104314011	T	A	0.173569	0.938155	1.29 (0.94-1.77)	0.109455	0.113273	0.911822	1.37 (0.82-2.3)	0.218549	1.31 (1-1.72)	0.0460512	no
rs73336657:G	10	104263624	T	G	0.281339	0.923041	1.12 (0.85-1.46)	0.414777	0.210369	0.894263	1.59 (1.08-2.34)	0.0173948	1.25 (1-1.56)	0.0460591	no
JHU_10.104386551	10	104386552	A	G	0.0449346	1	0.48 (0.26-0.88)	0.0142414	0.0421223	0.962084	0.92 (0.44-1.92)	0.818192	0.62 (0.39-0.99)	0.0463773	no
rs11595149:T	10	104235978	C	T	0.484393	0.965957	0.77 (0.6-0.97)	0.027569	0.466695	0.956486	0.94 (0.69-1.27)	0.669484	0.83 (0.68-1)	0.0465572	no
rs7076749:A	10	104469728	T	A	0.193213	0.865423	1.14 (0.84-1.56)	0.391041	0.23117	0.901289	1.51 (1.03-2.22)	0.0309736	1.28 (1-1.62)	0.0468403	no
rs11191377:C	10	104472777	T	C	0.193035	0.865663	1.14 (0.84-1.56)	0.393345	0.231104	0.901434	1.51 (1.03-2.22)	0.0316779	1.27 (1-1.62)	0.0477506	no
rs10786704:T	10	104475010	G	T	0.193047	0.865586	1.14 (0.84-1.56)	0.393354	0.2311	0.901451	1.51 (1.03-2.22)	0.0316809	1.27 (1-1.62)	0.0477511	no
rs34836365:AT	10	104366817	A	AT	0.408095	0.858649	1.22 (0.94-1.58)	0.130508	0.353981	0.857591	1.25 (0.89-1.75)	0.204102	1.23 (1-1.51)	0.0495246	no
Ref allele, reference allele.
Eff allele, effect allele.
EAF, effect allele frequency.
Info, imputation info score.
OR, odds ratio.
CI, confidence interval.
