# Supplementary material for: Genome-wide association study of leprosy in Malawi and Mali
Source: PLoS Pathog. 2022 Sep 19;18(9):e1010312. doi: 10.1371/journal.ppat.1010312 (PMC9624411; doi:10.1371/journal.ppat.1010312)
Supplement: S4 Table — (XLSX) [file ppat.1010312.s017.xlsx]

## Sheet: Sheet1
Ethnicity	Genotyping platform	Reference	Cases (n)	Controls (n)	Info	OR (95%CI)	p-value
Northern Han	Illumina Human610-Quad BeadChip	Zhang, et al. NEJM. 2009. PMID: 20018961.	706	1223	0.99647	0.96 (0.8-1.16)	0.68248
Northern Han	Illumina Human 660K-Quad BeadChips	Liu, et al. Nat Genet. 2015. PMID: 25642632.	374	510	0.99702	0.86 (0.7-1.06)	0.17106
Sichuan Han	Illumina Human 660K-Quad BeadChips	Liu, et al. Nat Genet. 2015. PMID: 25642632.	265	263	0.99857	0.92 (0.67-1.27)	0.62736
Southern Minority	Illumina Human 660K-Quad BeadChips	Liu, et al. Nat Genet. 2015. PMID: 25642632.	201	151	0.99923	1.11 (0.79-1.55)	0.56054
Northern Han	Illumina Omni Zhonghua Array	Wang, et al. Nat Commun. 2016. PMID: 27976721.	864	853	0.9994	1.05 (0.91-1.22)	0.48037
Yunnan Han	Illumina Omni Zhonghua Array	Wang, et al. Nat Commun. 2016. PMID: 27976721.	333	573	0.99922	0.94 (0.76-1.16)	0.56443
Total			2743	3573		0.98 (0.90-1.06)	0.587
Info, imputation info score; OR, odds ratio; CI, confidence interval.
