# Supplementary material for: Genome-wide association study of leprosy in Malawi and Mali
Source: PLoS Pathog. 2022 Sep 19;18(9):e1010312. doi: 10.1371/journal.ppat.1010312 (PMC9624411; doi:10.1371/journal.ppat.1010312)
Supplement: S6 Table — Integrated haplotype scores (iHS) and genome-wide log-rank p-values at chr10:104270877–104280877 in 25 1,000 genomes project populations. (XLSX) [file ppat.1010312.s019.xlsx]

## Sheet: Sheet1
Region	iHS	Rank p-value	1000GP population	1000GP super-population
chr10:104270877-104280877	2.85399	0.00110696	ASW	AFR
chr10:104270877-104280877	2.63505	0.00163807	LWK	AFR
chr10:104270877-104280877	2.20827	0.00566051	GWD	AFR
chr10:104270877-104280877	2.15046	0.00655219	MSL	AFR
chr10:104270877-104280877	1.99659	0.00964352	ESN	AFR
chr10:104270877-104280877	1.95943	0.0119116	PUR	AMR
chr10:104270877-104280877	1.88295	0.0140777	YRI	AFR
chr10:104270877-104280877	1.79948	0.0169458	ACB	AFR
chr10:104270877-104280877	1.80225	0.0189253	MXL	AMR
chr10:104270877-104280877	1.85036	0.0189912	CEU	EUR
chr10:104270877-104280877	1.7512	0.0261975	ITU	SAS
chr10:104270877-104280877	1.69951	0.0286544	FIN	EUR
chr10:104270877-104280877	1.64143	0.0346805	IBS	EUR
chr10:104270877-104280877	1.58433	0.0385811	PEL	AMR
chr10:104270877-104280877	1.56133	0.0440731	KHV	EAS
chr10:104270877-104280877	1.52369	0.049399	GBR	EUR
chr10:104270877-104280877	1.35714	0.0817661	CHS	EAS
chr10:104270877-104280877	1.24845	0.105842	BEB	SAS
chr10:104270877-104280877	1.24477	0.106942	TSI	EUR
chr10:104270877-104280877	1.20859	0.110822	CLM	AMR
chr10:104270877-104280877	1.23696	0.113785	CHB	EAS
chr10:104270877-104280877	1.20822	0.117038	PJL	SAS
chr10:104270877-104280877	1.14911	0.138038	STU	SAS
chr10:104270877-104280877	0.807609	0.35565	CDX	EAS
chr10:104270877-104280877	0.699848	0.463578	JPT	EAS
