# Supplementary material for: Genome-wide association study of leprosy in Malawi and Mali
Source: PLoS Pathog. 2022 Sep 19;18(9):e1010312. doi: 10.1371/journal.ppat.1010312 (PMC9624411; doi:10.1371/journal.ppat.1010312)
Supplement: S7 Table — Chromatin state segmentation data (http://genome.ucsc.edu/cgi-bin/hgFileUi?db=hg19&g=wgEncodeBroadHmm) across 9 cell types (H1 ES, embryonic stem cells; K562, erythrocytic leukemia cells; GM12878, B-lymphoblastoid cells; HepG2, hepatocellular carcinoma cells; HUVEC, umbilical vein endothelial cells; HSMM, skeletal muscle myoblasts; NHLF, normal lung fibroblasts, NHEK, normal epidermal keratinocytes; HMEC, mammary epithelial cells) at 33 99%credible set SNPs for the leprosy association at chromosome 10q24. (XLSX) [file ppat.1010312.s020.xlsx]

## Sheet: Sheet1
SNP			Cell type
RSID	CHR	BP	GM12878	K562	HSMM	H1-hESC	HMEC	HUVEC	NHEK	NHLF	HepG2
rs11591780:G	10	104225316	Heterochromatin; low signal	Weak transcribed	Heterochromatin; low signal	Weak transcribed	Heterochromatin; low signal	Heterochromatin; low signal	Weak transcribed	Heterochromatin; low signal	Heterochromatin; low signal
rs71016381:C	10	104226239	Heterochromatin; low signal	Weak transcribed	Heterochromatin; low signal	Weak transcribed	Heterochromatin; low signal	Heterochromatin; low signal	Weak transcribed	Heterochromatin; low signal	Heterochromatin; low signal
rs1984795:T	10	104226830	Heterochromatin; low signal	Weak transcribed	Heterochromatin; low signal	Weak transcribed	Heterochromatin; low signal	Heterochromatin; low signal	Weak transcribed	Heterochromatin; low signal	Heterochromatin; low signal
rs2015583:G	10	104226983	Heterochromatin; low signal	Weak transcribed	Heterochromatin; low signal	Weak transcribed	Heterochromatin; low signal	Heterochromatin; low signal	Weak transcribed	Heterochromatin; low signal	Heterochromatin; low signal
rs12781718:A	10	104227433	Heterochromatin; low signal	Strong enhancer	Heterochromatin; low signal	Weak transcribed	Heterochromatin; low signal	Heterochromatin; low signal	Weak transcribed	Heterochromatin; low signal	Heterochromatin; low signal
rs12781742:A	10	104227469	Heterochromatin; low signal	Strong enhancer	Heterochromatin; low signal	Weak transcribed	Heterochromatin; low signal	Heterochromatin; low signal	Weak transcribed	Heterochromatin; low signal	Heterochromatin; low signal
rs12762305:T	10	104227623	Heterochromatin; low signal	Strong enhancer	Heterochromatin; low signal	Weak transcribed	Heterochromatin; low signal	Heterochromatin; low signal	Weak transcribed	Heterochromatin; low signal	Heterochromatin; low signal
rs12763794:C	10	104227661	Heterochromatin; low signal	Strong enhancer	Heterochromatin; low signal	Weak transcribed	Heterochromatin; low signal	Heterochromatin; low signal	Weak transcribed	Heterochromatin; low signal	Heterochromatin; low signal
rs35826034:G	10	104227791	Heterochromatin; low signal	Strong enhancer	Heterochromatin; low signal	Weak transcribed	Heterochromatin; low signal	Heterochromatin; low signal	Weak transcribed	Heterochromatin; low signal	Heterochromatin; low signal
rs11593526:A	10	104228017	Heterochromatin; low signal	Strong enhancer	Heterochromatin; low signal	Weak transcribed	Heterochromatin; low signal	Heterochromatin; low signal	Weak transcribed	Heterochromatin; low signal	Heterochromatin; low signal
rs11593583:A	10	104228149	Heterochromatin; low signal	Strong enhancer	Heterochromatin; low signal	Weak transcribed	Heterochromatin; low signal	Heterochromatin; low signal	Weak transcribed	Heterochromatin; low signal	Heterochromatin; low signal
rs11593589:A	10	104228299	Heterochromatin; low signal	Weak enhancer	Heterochromatin; low signal	Weak transcribed	Heterochromatin; low signal	Heterochromatin; low signal	Weak transcribed	Weak enhancer	Heterochromatin; low signal
rs139495724:CA	10	104228423	Heterochromatin; low signal	Weak enhancer	Heterochromatin; low signal	Weak transcribed	Heterochromatin; low signal	Heterochromatin; low signal	Weak transcribed	Weak enhancer	Heterochromatin; low signal
rs35597970:CA	10	104229057	Heterochromatin; low signal	Weak transcribed	Heterochromatin; low signal	Weak transcribed	Heterochromatin; low signal	Heterochromatin; low signal	Weak transcribed	Weak transcribed	Heterochromatin; low signal
10:104229299:AGGT	10	104229299	Heterochromatin; low signal	Weak transcribed	Heterochromatin; low signal	Weak transcribed	Heterochromatin; low signal	Heterochromatin; low signal	Weak transcribed	Weak transcribed	Heterochromatin; low signal
rs35249074:GT	10	104229309	Heterochromatin; low signal	Weak transcribed	Heterochromatin; low signal	Weak transcribed	Heterochromatin; low signal	Heterochromatin; low signal	Weak transcribed	Weak transcribed	Heterochromatin; low signal
rs41306870:T	10	104229785	Heterochromatin; low signal	Weak transcribed	Heterochromatin; low signal	Weak transcribed	Heterochromatin; low signal	Heterochromatin; low signal	Weak transcribed	Weak transcribed	Heterochromatin; low signal
rs2025712:C	10	104230064	Heterochromatin; low signal	Weak transcribed	Heterochromatin; low signal	Weak transcribed	Heterochromatin; low signal	Heterochromatin; low signal	Weak transcribed	Weak transcribed	Heterochromatin; low signal
rs2025713:G	10	104230156	Heterochromatin; low signal	Weak transcribed	Heterochromatin; low signal	Weak transcribed	Heterochromatin; low signal	Heterochromatin; low signal	Weak transcribed	Weak transcribed	Heterochromatin; low signal
rs58061354:T	10	104230930	Heterochromatin; low signal	Weak transcribed	Heterochromatin; low signal	Weak transcribed	Heterochromatin; low signal	Heterochromatin; low signal	Weak transcribed	Weak transcribed	Heterochromatin; low signal
rs11191295:G	10	104231054	Heterochromatin; low signal	Weak transcribed	Heterochromatin; low signal	Weak transcribed	Heterochromatin; low signal	Heterochromatin; low signal	Weak transcribed	Weak transcribed	Heterochromatin; low signal
rs11356476:G	10	104231519	Heterochromatin; low signal	Weak transcribed	Heterochromatin; low signal	Weak transcribed	Heterochromatin; low signal	Heterochromatin; low signal	Weak transcribed	Weak transcribed	Heterochromatin; low signal
rs7081110:G	10	104231651	Heterochromatin; low signal	Weak transcribed	Heterochromatin; low signal	Weak transcribed	Heterochromatin; low signal	Heterochromatin; low signal	Weak transcribed	Weak transcribed	Heterochromatin; low signal
rs7081467:C	10	104231662	Heterochromatin; low signal	Weak transcribed	Heterochromatin; low signal	Weak transcribed	Heterochromatin; low signal	Heterochromatin; low signal	Weak transcribed	Weak transcribed	Heterochromatin; low signal
rs3740415:A	10	104232716	Heterochromatin; low signal	Weak transcribed	Heterochromatin; low signal	Weak transcribed	Heterochromatin; low signal	Heterochromatin; low signal	Weak transcribed	Weak transcribed	Heterochromatin; low signal
rs3740414:G	10	104232809	Heterochromatin; low signal	Weak transcribed	Heterochromatin; low signal	Weak transcribed	Heterochromatin; low signal	Heterochromatin; low signal	Weak transcribed	Weak transcribed	Heterochromatin; low signal
rs12570859:T	10	104257226	Weak transcribed	Weak transcribed	Weak transcribed	Weak transcribed	Weak transcribed	Transcriptional transition	Transcriptional elongation	Weak transcribed	Weak transcribed
rs715440:T	10	104258095	Weak transcribed	Weak transcribed	Transcriptional transition	Weak transcribed	Weak transcribed	Transcriptional transition	Transcriptional elongation	Weak transcribed	Weak transcribed
rs12766112:T	10	104260388	Weak transcribed	Weak enhancer	Weak transcribed	Transcriptional transition	Weak transcribed	Transcriptional transition	Weak transcribed	Weak transcribed	Weak transcribed
rs2274351:T	10	104264107	Active promoter	Active promoter	Active promoter	Weak promoter	Active promoter	Active promoter	Active promoter	Active promoter	Active promoter
10:104278272:GTCTATCTA	10	104278272	Weak transcribed	Weak transcribed	Weak transcribed	Weak transcribed	Weak transcribed	Weak transcribed	Weak transcribed	Weak transcribed	Weak transcribed
rs12768479:A	10	104278276	Weak transcribed	Weak transcribed	Weak transcribed	Weak transcribed	Weak transcribed	Weak transcribed	Weak transcribed	Weak transcribed	Weak transcribed
