# Supplementary material for: Genome-wide association study of leprosy in Malawi and Mali
Source: PLoS Pathog. 2022 Sep 19;18(9):e1010312. doi: 10.1371/journal.ppat.1010312 (PMC9624411; doi:10.1371/journal.ppat.1010312)
Supplement: S10 Table — (XLSX) [file ppat.1010312.s023.xlsx]

## Sheet: Sheet1
Locus					Association statistics						Risk allele frequency			Allele frequency difference
SNP	Risk allele	Chr	Position	Gene	Malawi: OR (95% CI)	Malawi: P-value	Mali: OR (95% CI)	Mali: P-value	Meta: OR (95% CI)	Meta: P-value	Malawi	Mali	Discovery population	Malawi: discovery population	Mali: discovery population	Study replication power**	Reference & PMID
rs3762318	A	1	67597119	IL23R	1.09 (0.81-1.47)	0.567	0.75 (0.46-1.22)	0.236	0.98 (0.76-1.27)	0.905	0.748	0.775323	0.9	0.152	0.124677	0.957765	Zhang, et al. Nat Genet. 2011. PMID: 22019778.
rs76418789	A	1	67648596	IL23R	NA	NA	NA	NA	NA	NA	0.004	0.00197403	0.043	0.039	0.041026	0.0738797	Liu, et al. J Invest Dermatol. 2017. PMID: 28842327.
rs2735591	A	1	85744472	BCL10	1.06 (0.79-1.43)	0.699	1.27 (0.87-1.86)	0.213	1.14 (0.9-1.44)	0.283	0.199	0.234	0.29	0.091	0.056	0.121306	Liu, et al. Hum Mol Genet. 2013. PMID: 23784377.
rs146466242	A	1	152275298	FLG	NA	NA	NA	NA	NA	NA	0	0.000806361	0.035	0.035	0.0341936	0.0559769	Liu, et al. J Invest Dermatol. 2017. PMID: 28842327.
rs2221593	T	1	212873431	BATF3	1.05 (0.63-1.73)	0.863	0.73 (0.38-1.41)	0.345	0.91 (0.61-1.36)	0.662	0.068	0.0703425	0.199	0.131	0.128658	0.148465	Liu, et al. Nat Genet. 2015. PMID: 25642632.
rs2058660	A	2	103054449	IL18RAP/IL18R1	1.35 (0.92-1.97)	0.121	0.76 (0.46-1.25)	0.278	1.09 (0.81-1.47)	0.569	0.897	0.894199	0.49	0.407	0.404199	0.341975	Liu , et al. AJHG. 2012. PMID: 23103228.
rs6807915	T	3	12313846	SYN2	0.94 (0.71-1.26)	0.701	1.29 (0.87-1.93)	0.202	1.05 (0.83-1.33)	0.66	0.253	0.277	0.48	0.227	0.203	0.239587	Wang, et al. Nat Commun. 2016. PMID: 27976721.
rs145562243	T	3	48719549	NCKIPSD	NA	NA	NA	NA	NA	NA	NA	NA	0.0004	NA	NA	NA	Liu, et al. J Invest Dermatol. 2017. PMID: 28842327.
rs5743618	A	4	38798648	TLR1	0.58 (0.25-1.33)	0.191	0.63 (0.18-2.24)	0.465	0.59 (0.3-1.19)	0.142	0.97	0.974104	0.87	0.1	0.104104	0.864475	Wong, et al. PLoS Pathog. 2010. PMID: 20617178.
rs73058713	A	5	20374213	intergenic	1.24 (0.94-1.63)	0.131	1.02 (0.69-1.49)	0.928	1.16 (0.92-1.45)	0.203	0.282	0.272689	0.145	0.137	0.127689	0.504198	Liu, et al. Nat Genet. 2015. PMID: 25642632.
rs6871626	C	5	158826792	IL12B	NA	NA	NA	NA	NA	NA	NA	NA	0.65	NA	NA	NA	Liu , et al. AJHG. 2012. PMID: 23103228.
rs2275606	A	6	146918950	RAB32	0.86 (0.46-1.58)	0.618	1.51 (0.81-2.8)	0.187	1.13 (0.73-1.75)	0.581	0.067	0.103212	0.21	0.143	0.106788	0.485879	Zhang, et al. Nat Genet. 2011. PMID: 22019778.
rs1801582	G	6	161807855	PRKN	0.81 (0.60-1.10)	0.18	0.94 (0.60-1.45)	0.767823	0.85 (0.66-1.09)	0.206	0.242	0.197	0.101	0.141	0.096	0.978	Wang, et al. AJHG. 2018. PMID: 29706348.
rs4720118	T	7	33469241	BBS9	0.86 (0.58-1.28)	0.449	0.9 (0.57-1.43)	0.662	0.88 (0.65-1.18)	0.39	0.123	0.156	0.29	0.167	0.134	0.190072	Wang, et al. Nat Commun. 2016. PMID: 27976721.
rs55894533	C	8	11749242	CTSB	1.05 (0.81-1.36)	0.713	1.02 (0.72-1.44)	0.913	1.04 (0.85-1.27)	0.72	0.408	0.386961	0.42	0.012	0.033039	0.441954	Wang, et al. Nat Commun. 2016. PMID: 27976721.
rs13259978	C	8	17396415	SLC7A2	0.93 (0.66-1.31)	0.679	0.79 (0.49-1.27)	0.335	0.88 (0.67-1.16)	0.372	0.233	0.291	0.08	0.153	0.211	0.791882	Wang, et al. Clin Genet. 2018. PMID: 29722023.
rs160451	C	8	90662941	RIPK2	1.15 (0.86-1.54)	0.343	0.98 (0.66-1.47)	0.938	1.09 (0.86-1.38)	0.47	0.532	0.465943	0.235	0.297	0.230943	0.866121	Liu, et al. Nat Genet. 2015. PMID: 25642632.
rs42490	G	8	90778513	RIPK2	1.04 (0.72-1.51)	0.839	0.97 (0.64-1.48)	0.889	1.01 (0.76-1.33)	0.95	0.846	0.770781	0.58	0.266	0.190781	0.962596	Zhang, et al. NEJM. 2009. PMID: 20018961.
rs10100465	G	8	118626279	MED30	1.01 (0.76-1.33)	0.947	0.9 (0.64-1.26)	0.537	0.96 (0.78-1.19)	0.734	0.309	0.387771	0.28	0.029	0.107771	0.438314	Wang, et al. Nat Commun. 2016. PMID: 27976721.
rs6478108	A	9	117558703	TNFSF15	0.92 (0.63-1.33)	0.655	1.27 (0.68-2.37)	0.458	1 (0.73-1.38)	0.999	0.855	0.89773	0.46	0.395	0.43773	0.890998	Zhang, et al. NEJM. 2009. PMID: 20018961.
rs10817758	T	9	118143933	DEC1	1.15 (0.78-1.7)	0.482	1.26 (0.76-2.09)	0.372	1.19 (0.87-1.62)	0.273	0.132	0.126242	0.381	0.249	0.254758	0.180479	Liu, et al. Nat Genet. 2015. PMID: 25642632.
rs149308743	T	9	139258965	CARD9	NA	NA	NA	NA	NA	NA	0.001	0.000961671	0.0006	0.0004	0.000361671	0.439855	Liu, et al. J Invest Dermatol. 2017. PMID: 28842327.
rs58600253	T	10	64507904	intergenic	0.72 (0.42-1.26)	0.246	0.76 (0.37-1.57)	0.461	0.74 (0.47-1.15)	0.175	0.044	0.0526722	0.145	0.101	0.0923278	0.199507	Liu, et al. Nat Genet. 2015. PMID: 25642632.
rs780668	T	10	73111408	SLC29A3	1.14 (0.87-1.5)	0.332	1.62 (1.08-2.42)	0.016	1.28 (1.02-1.6)	0.034	0.357	0.349861	0.421	0.064	0.071139	0.347813	Liu, et al. J Invest Dermatol. 2017. PMID: 28842327.
rs663743	A	11	64107735	CCDC88B	0.69 (0.11-4.19)	0.677	0.96 (0.34-2.74)	0.941	0.89 (0.36-2.19)	0.792	0.007	0.0230429	0.14602	0.13902	0.122977	0.105542	Liu, et al. Nat Genet. 2015. PMID: 25642632.
rs1873613	A	12	40552417	LRRK2	NA	NA	NA	NA	NA	NA	NA	NA	0.75	NA	NA	NA	Zhang, et al. NEJM. 2009. PMID: 20018961.
rs925368	C	12	110390979	GIT2	NA	NA	NA	NA	NA	NA	0	0	0.06	0.06	0.06	NA	Wang, et al. Clin Genet. 2018. PMID: 29722023.
rs671	A	12	112241766	ALDH2	NA	NA	NA	NA	NA	NA	0	0.002	0.15	0.15	0.148	0.0575063	Wang, et al. Clin Genet. 2018. PMID: 29722023.
rs3764147	G	13	44457925	LACC1	1.27 (0.98-1.66)	0.075	1.5 (1.08-2.1)	0.015	1.36 (1.1-1.67)	0.004	0.361	0.362141	0.31	0.051	0.052141	1	Zhang, et al. NEJM. 2009. PMID: 20018961.
rs8002861*	A	13	44474517	LACC1	1.12 (0.83-1.52)	0.455	0.99 (0.65-1.50)	0.947	1.07 (0.84-1.38)	0.569	0.706	0.617875	0.672	0.034	0.054125	0.230911	Liu, et al. Nat Genet. 2015. PMID: 25642632.
rs142179458	A	14	62203623	HIF1A	NA	NA	NA	NA	NA	NA	0.001	6.65046e-05	0.027	0.026	0.0269335	0.0870542	Wang, et al. AJHG. 2018. PMID: 29706348.
rs77061563	C	16	11452542	LOC388210	0.52 (0.18-1.48)	0.204	0.72 (0.21-2.44)	0.601	0.6 (0.27-1.32)	0.204	0.022	0.0144183	0.377	0.355	0.362582	0.0922535	Liu, et al. Nat Genet. 2015. PMID: 25642632.
rs9302752	G	16	50719103	NOD2	1.2 (0.93-1.56)	0.166	0.79 (0.53-1.17)	0.242	1.06 (0.85-1.32)	0.61	0.586	0.62775	0.29	0.296	0.33775	1	Zhang, et al. NEJM. 2009. PMID: 20018961.
rs2066844***	T	16	50745926	NOD2	NA	NA	NA	NA	NA	NA	0.002	0.002	NA	NA	NA	NA	Paç Kısaarslan, et al. Arch Rheumatol. PMID: 32637927
rs5743291***	A	16	50757276	NOD2	NA	NA	NA	NA	NA	NA	0.006	0.01	NA	NA	NA	NA	Paç Kısaarslan, et al. Arch Rheumatol. PMID: 32637927
rs16948876	A	16	50854418	CYLD	0.42 (0.09-2.04)	0.238	0.95 (0.26-3.5)	0.939	0.68 (0.25-1.87)	0.458	0.016	0.0199117	0.03	0.014	0.0100883	0.377113	Zhang, et al. Nat Genet. 2011. PMID: 22019778.
rs75680863	A	22	31007023	TCN2	NA	NA	NA	NA	NA	NA	0.001	0.00120424	0.23	0.229	0.228796	0.0575466	Wang, et al. Clin Genet. 2018. PMID: 29722023.
*Conditionned on rs3764147
**Power to replicate reported effect sizes at a<0.05
***pathogenic NOD2 variants causing e.g. Blau syndrome
OR, odds ratio.
CI, confidence interval.
