# Supplementary material for: Genome-wide association study of leprosy in Malawi and Mali
Source: PLoS Pathog. 2022 Sep 19;18(9):e1010312. doi: 10.1371/journal.ppat.1010312 (PMC9624411; doi:10.1371/journal.ppat.1010312)
Supplement: S11 Table — (XLSX) [file ppat.1010312.s024.xlsx]

## Sheet: Sheet1
Locus					Risk allele frequency		Association statistics
SNP	Risk allele	Chr	Position	Gene	Malawi	Mali	Multibacillary: OR (95% CI)	Multibacillary: P-value	Paucibacillary: OR (95% CI)	Paucibacillary: P-value	Study replication power**
rs3762318	A	1	67597119	IL23R	0.748	0.775323	0.86 (0.58-1.26)	0.430005	1.02 (0.77-1.35)	0.905089	0.957765
rs76418789	A	1	67648596	IL23R	0.004	0.00197403	NA	NA	NA	NA	0.0738797
rs2735591	A	1	85744472	BCL10	0.801	0.765998	1.15 (0.82-1.62)	0.40875	1.11 (0.85-1.45)	0.457978	0.121306
rs146466242	A	1	152275298	FLG	0	0.000806361	NA	NA	NA	NA	0.0559769
rs2221593	T	1	212873431	BATF3	0.068	0.0703425	0.78 (0.43-1.42)	0.417889	1 (0.64-1.57)	0.997128	0.148465
rs2058660	A	2	103054449	IL18RAP/IL18R1	0.897	0.894199	1.19 (0.77-1.86)	0.433189	1.05 (0.75-1.48)	0.774011	0.341975
rs6807915	T	3	12313846	SYN2	0.747	0.732897	0.99 (0.7-1.4)	0.959958	1.08 (0.82-1.41)	0.596425	0.239587
rs145562243	T	3	48719549	NCKIPSD	NA	NA	NA	NA	NA	NA	NA
rs5743618	A	4	38798648	TLR1	0.97	0.974104	0.5 (0.14-1.84)	0.29795	1.19 (0.18-7.82)	0.854157	0.864475
rs73058713	A	5	20374213	intergenic	0.282	0.272689	1.09 (0.78-1.53)	0.609254	1.19 (0.92-1.53)	0.18671	0.504198
rs6871626	C	5	158826792	IL12B	NA	NA	NA	NA	NA	NA	NA
rs2275606	A	6	146918950	RAB32	0.067	0.103212	1.36 (0.77-2.4)	0.294355	0.99 (0.59-1.65)	0.962098	0.485879
rs1801582	G	6	161807855	PRKN	0.242	0.197					0.978
rs4720118	T	7	33469241	BBS9	0.887	0.843879	1.19 (0.76-1.85)	0.449858	0.73 (0.52-1.02)	0.0631013	0.190072
rs55894533	C	8	11749242	CTSB	0.408	0.386961	0.96 (0.71-1.3)	0.803142	1.05 (0.83-1.32)	0.701223	0.441954
rs13259978	C	8	17396415	SLC7A2	0.233	0.291	NA	NA	NA	NA	0.791882
rs160451	C	8	90662941	RIPK2	0.532	0.465943	1.09 (0.77-1.56)	0.618864	1.08 (0.83-1.41)	0.564038	0.866121
rs42490	G	8	90778513	RIPK2	0.846	0.770781	0.85 (0.58-1.23)	0.388256	1.09 (0.79-1.51)	0.599546	0.962596
rs10100465	G	8	118626279	MED30	0.309	0.387771	1.2 (0.88-1.62)	0.2515	0.84 (0.65-1.08)	0.177045	0.438314
rs6478108	A	9	117558703	TNFSF15	0.855	0.89773	0.97 (0.58-1.62)	0.893969	0.99 (0.7-1.41)	0.953106	0.890998
rs10817758	T	9	118143933	DEC1	0.132	0.126242	1.13 (0.72-1.79)	0.591803	1.22 (0.87-1.73)	0.25142	0.180479
rs149308743	T	9	139258965	CARD9	0.001	0.000961671	NA	NA	NA	NA	0.439855
rs58600253	T	10	64507904	intergenic	0.044	0.0526722	0.66 (0.32-1.37)	0.267665	0.75 (0.45-1.23)	0.253387	0.199507
rs780668	T	10	73111408	SLC29A3	0.357	0.349861	1.37 (0.97-1.94)	0.0744925	1.24 (0.97-1.6)	0.0851881	0.347813
rs663743	A	11	64107735	CCDC88B	0.007	0.0230429	0.99 (0.34-2.89)	0.981396	1.14 (0.33-3.94)	0.830784	0.105542
rs1873613	A	12	40552417	LRRK2	NA	NA	NA	NA	NA	NA	NA
rs925368	C	12	110390979	GIT2	0	0	NA	NA	NA	NA	NA
rs671	A	12	112241766	ALDH2	0	0.002	NA	NA	NA	NA	0.0575063
rs3764147	G	13	44457925	LACC1	0.361	0.362141	1.43 (1.07-1.92)	0.0162956	1.33 (1.05-1.68)	0.0171787	1
rs8002861*	A	13	44474517	LACC1	0.706	0.617875	1.17 (0.87-1.57)	0.289273	1.3 (1.03-1.65)	0.0277094	0.230911
rs142179458	A	14	62203623	HIF1A	0.001	6.65046e-05	NA	NA	NA	NA	0.0870542
rs77061563	C	16	11452542	LOC388210	0.022	0.0144183	0.62 (0.2-1.88)	0.394067	0.62 (0.24-1.6)	0.322499	0.0922535
rs9302752	G	16	50719103	NOD2	0.586	0.62775	1.21 (0.86-1.69)	0.278606	1 (0.78-1.27)	0.991973	1
rs2066844***	T	16	50745926	NOD2	0.002	0.002	NA	NA	NA	NA	NA
rs5743291***	A	16	50757276	NOD2	0.006	0.01	NA	NA	NA	NA	NA
rs16948876	A	16	50854418	CYLD	0.016	0.0199117	1.28 (0.34-4.86)	0.720309	0.49 (0.14-1.76)	0.276227	0.377113
rs75680863	A	22	31007023	TCN2	0.001	0.00120424	NA	NA	NA	NA	0.0575466
*Conditionned on rs3764147
**Power to replicate reported effect sizes at a<0.05
***Crohn's disease lead variant
OR, odds ratio.
CI, confidence interval.
