# Supplementary material for: Genome-wide association study of leprosy in Malawi and Mali
Source: PLoS Pathog. 2022 Sep 19;18(9):e1010312. doi: 10.1371/journal.ppat.1010312 (PMC9624411; doi:10.1371/journal.ppat.1010312)
Supplement: S12 Table — (XLSX) [file ppat.1010312.s025.xlsx]

## Sheet: Sheet1
		Malawi samples		Mali samples
		Cases	Controls	Cases	Controls
	Total pre-QC	327	436	247	185
Exclusions	Failed genotyping	6	8	1	0
	Channel intensity	28	38	9	17
	Call rate & heterozygosity	10	32	23	14
	AGVP PCA outliers	1	1	1	2
	Discordant sex checks	1	2	4	4
	Duplicate samples	0	0	1	0
	Relatedness (IBD>0.2)	13	25	2	12
	Total post-QC	284	328	208	142
